# Supplementary material for: A performance comparison of the most commonly used minimally invasive monitors of cardiac output
Source: Springer Nature journal article supplement (doi:10.1007/s12630-021-02085-0), 2021-08-09

**Electronic Supplementary Materials. Table of Contents.**

|                 |                                                                                                               |
|-----------------|---------------------------------------------------------------------------------------------------------------|
| <b>eFig. 1a</b> | <b>Flow over time as assessed by Aortic Root Flow Probe, PiCCOplus, CardioQ-ODM, and FloTrac. Animal 2.</b>   |
| <b>eFig. 1b</b> | <b>Flow over time as assessed by Aortic Root Flow Probe, PiCCOplus, CardioQ-ODM, and FloTrac. Animal 3.</b>   |
| <b>eFig. 1c</b> | <b>Flow over time as assessed by Aortic Root Flow Probe, PiCCOplus, CardioQ-ODM, and FloTrac. Animal 4.</b>   |
| <b>eFig. 1d</b> | <b>Flow over time as assessed by Aortic Root Flow Probe, PiCCOplus, CardioQ-ODM, and FloTrac. Animal 6.</b>   |
| <b>eFig. 1e</b> | <b>Flow over time as assessed by Aortic Root Flow Probe, PiCCOplus, and CardioQ-ODM. Animal 7.</b>            |
| <b>eFig. 1f</b> | <b>Flow over time as assessed by Aortic Root Flow Probe, PiCCOplus, CardioQ-ODM, and FloTrac. Animal 8.</b>   |
| <b>eFig. 1g</b> | <b>Flow over time as assessed by Aortic Root Flow Probe, PiCCOplus, CardioQ-ODM, and FloTrac. Animal 9.</b>   |
| <b>eFig. 1h</b> | <b>Flow over time as assessed by Aortic Root Flow Probe, PiCCOplus, CardioQ-ODM, and FloTrac. Animal 10.</b>  |
| <b>eFig. 1i</b> | <b>Flow over time as assessed by Aortic Root Flow Probe, PiCCOplus, CardioQ-ODM, and FloTrac. Animal 11.</b>  |
| <b>eFig. 1j</b> | <b>Flow over time as assessed by Aortic Root Flow Probe, PiCCOplus, CardioQ-ODM, and FloTrac. Animal 12.</b>  |
| <b>eFig. 1k</b> | <b>Flow over time as assessed by Aortic Root Flow Probe, PiCCOplus, CardioQ-ODM, and FloTrac. All Animals</b> |
| <b>eFig. 2a</b> | <b>Scatter Plot. PiCCOplus vs Aortic Root. All Flows.</b>                                                     |
| <b>eFig. 2b</b> | <b>Scatter Plot. FloTrac vs Aortic Root. All Flows</b>                                                        |
| <b>eFig. 2c</b> | <b>Scatter Plot. CardioQ-ODM vs Aortic Root. All Flows</b>                                                    |
| <b>eFig. 2d</b> | <b>Scatter Plot. Invasive Mean Arterial Pressure vs Aortic Root. All Flows</b>                                |
| <b>eFig. 3a</b> | <b>4 Quadrant Plot. PiCCOplus vs Aortic Root. All Flows</b>                                                   |
| <b>eFig. 3b</b> | <b>4 Quadrant Plot. PiCCOplus vs Aortic Root. Low Flows</b>                                                   |
| <b>eFig. 3c</b> | <b>4 Quadrant Plot. FloTrac vs Aortic Root. All Flows</b>                                                     |
| <b>Fig. 3d</b>  | <b>4 Quadrant Plot. FloTrac vs Aortic Root. Low Flows</b>                                                     |
| <b>eFig. 3e</b> | <b>4 Quadrant Plot. CardioQ-ODM vs Aortic Root. All Flows</b>                                                 |
| <b>eFig. 3f</b> | <b>4 Quadrant Plot. CardioQ-ODM vs Aortic Root. Low Flows</b>                                                 |
| <b>eFig. 3g</b> | <b>4 Quadrant Plot. Invasive Mean Arterial Pressure vs Aortic Root. All Flows</b>                             |
| <b>eFig. 3h</b> | <b>4 Quadrant Plot. Invasive Mean Arterial Pressure vs Aortic Root. Low Flows</b>                             |

Flow over time as assessed by Aortic Root Flow Probe, PiCCOplus, CardioQ-ODM, and FloTrac. Animal 2

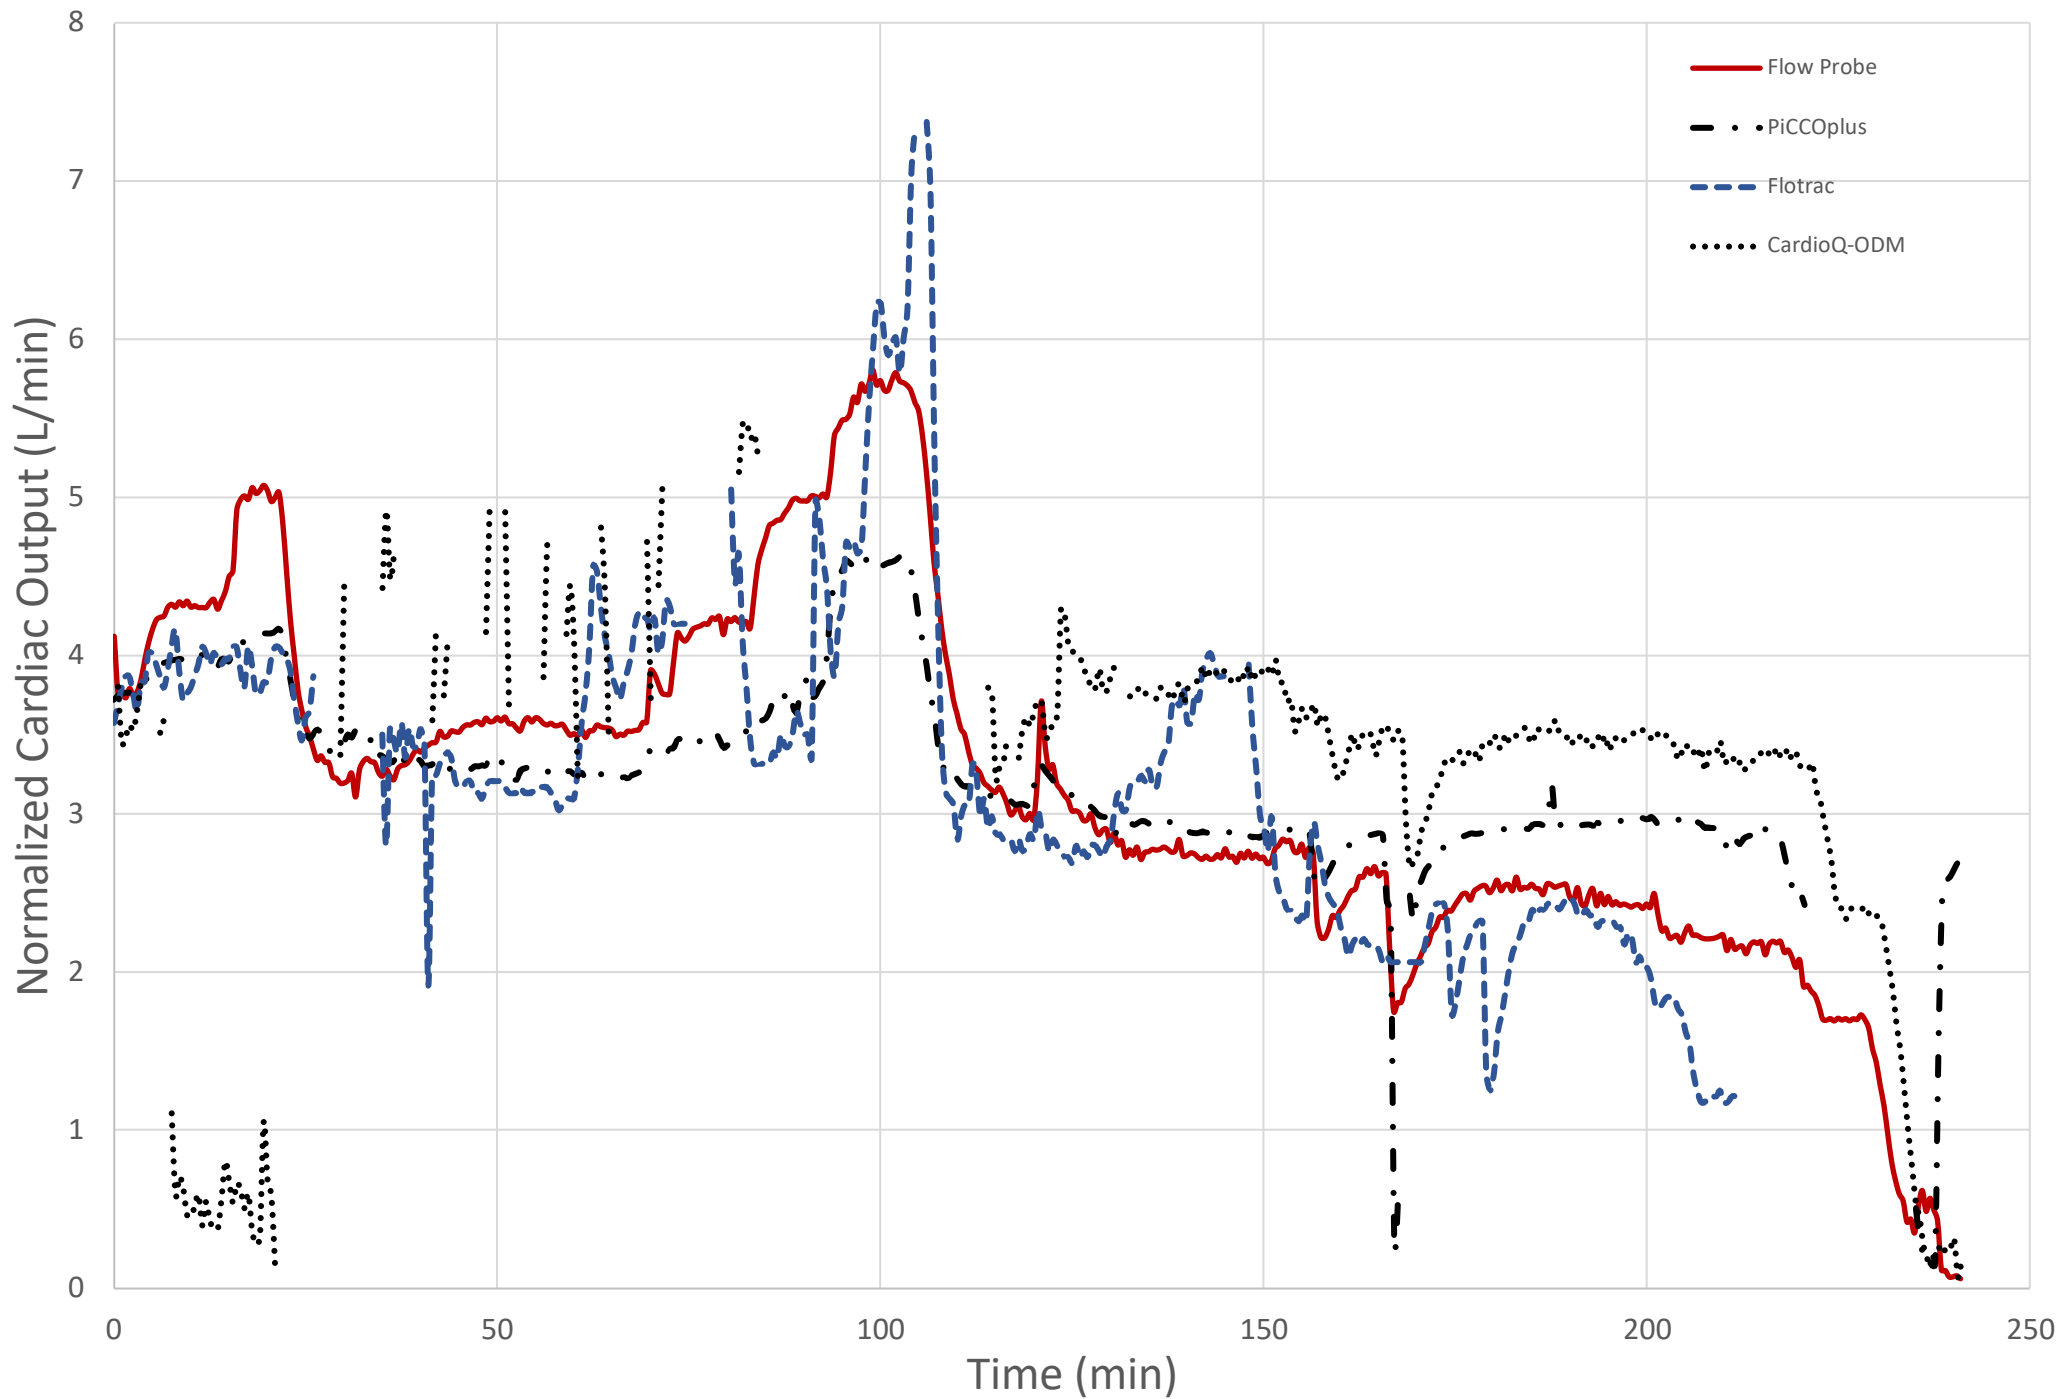

Flow over time as assessed by Aortic Root Flow Probe, PiCCOplus, CardioQ-ODM, and FloTrac . Animal 3

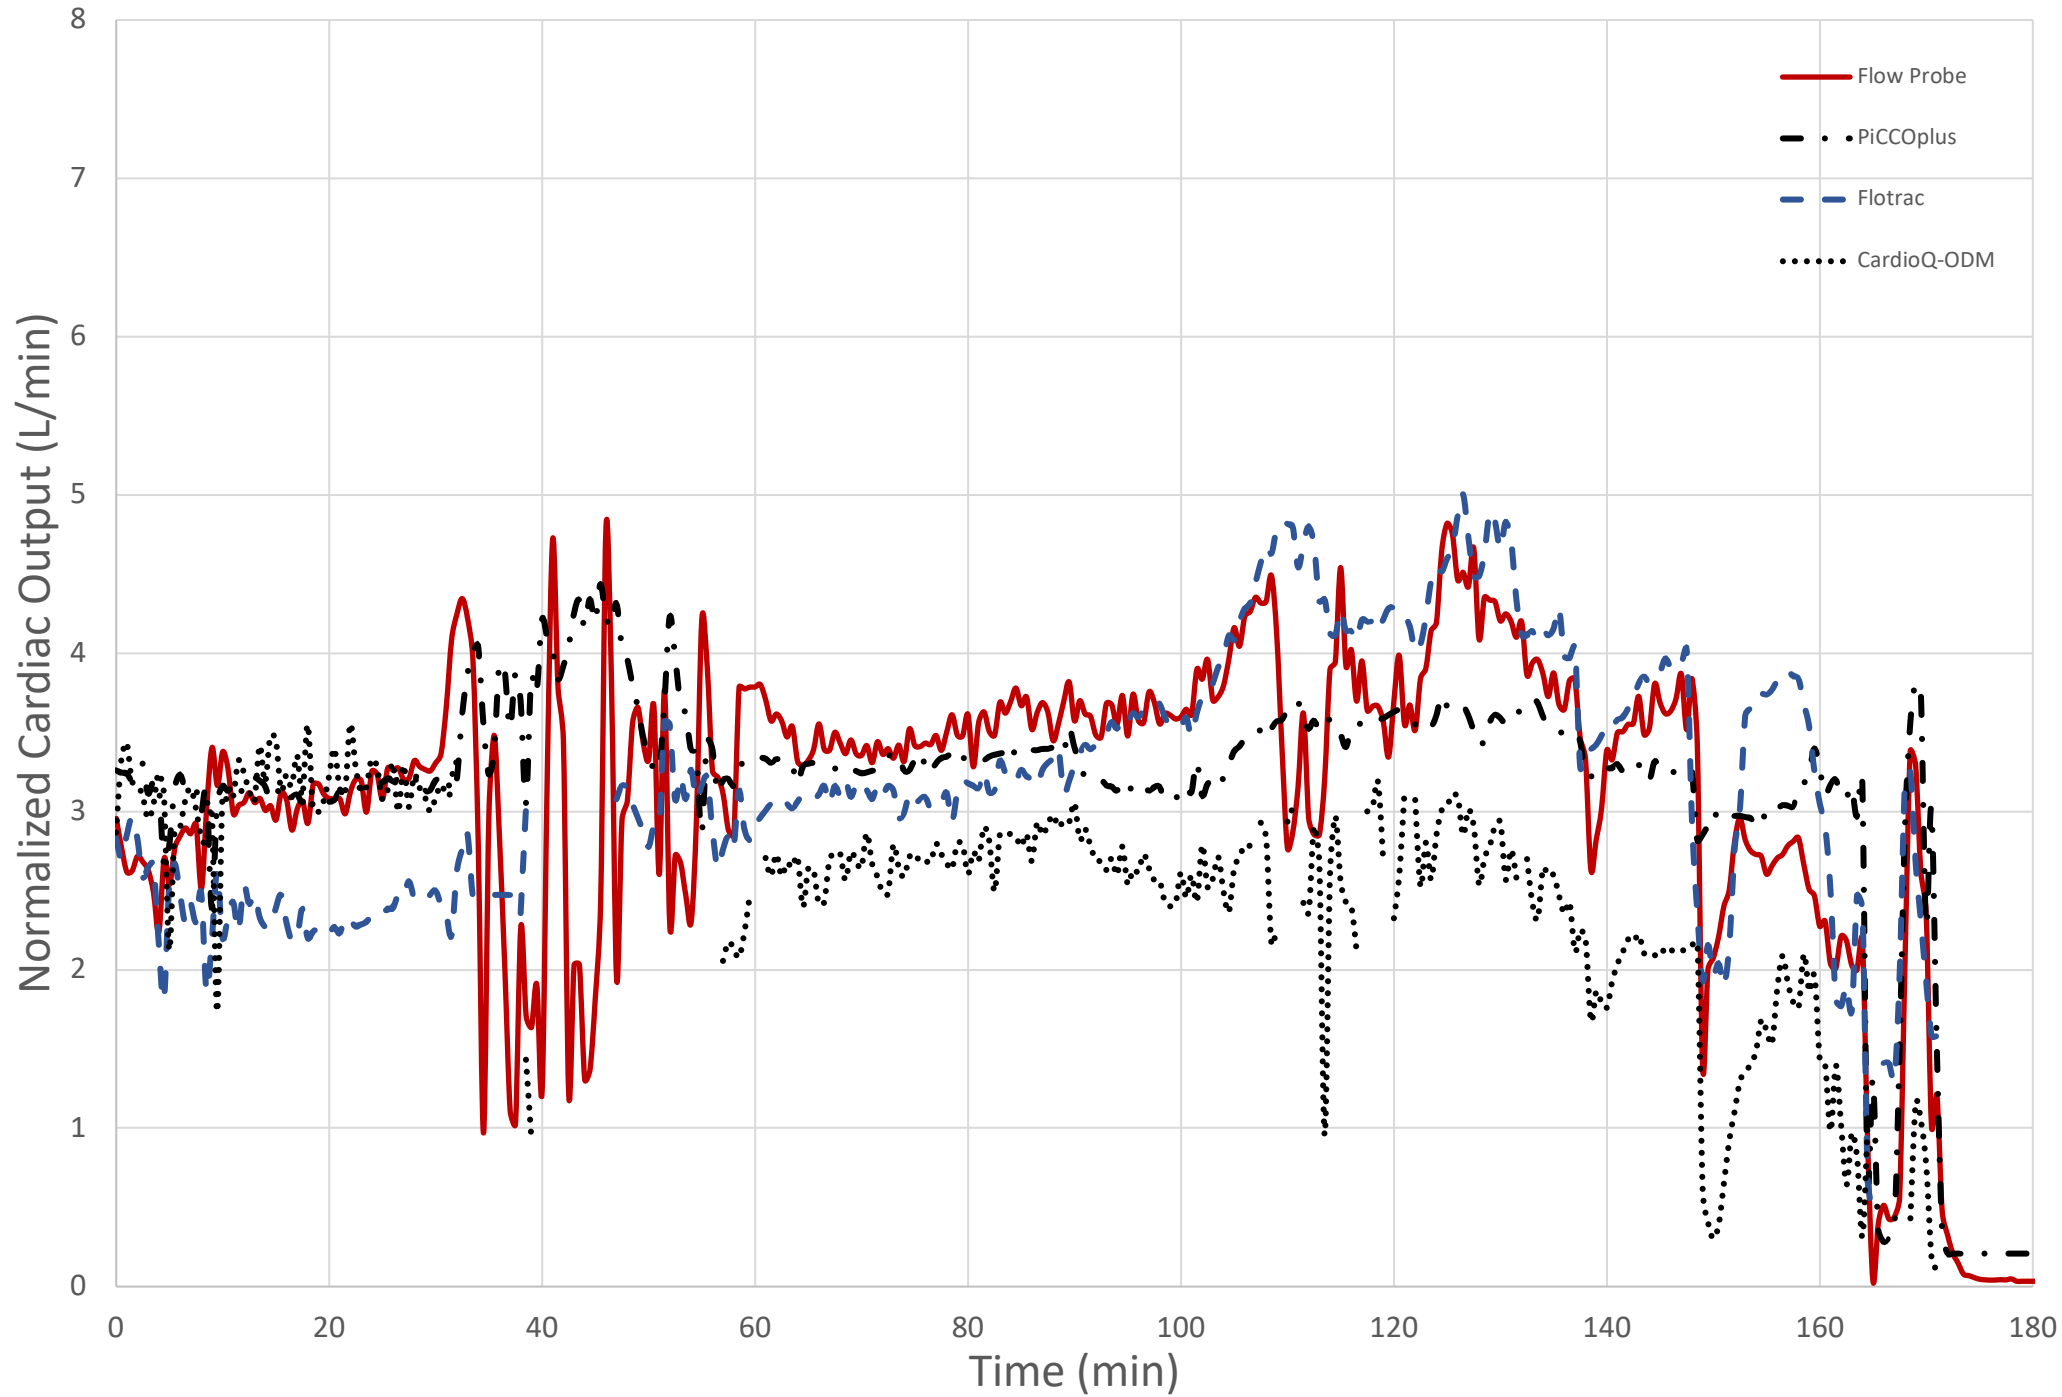

Flow over time as assessed by Aortic Root Flow Probe, PiCCOplus, CardioQ-ODM, and FloTrac. Animal 4

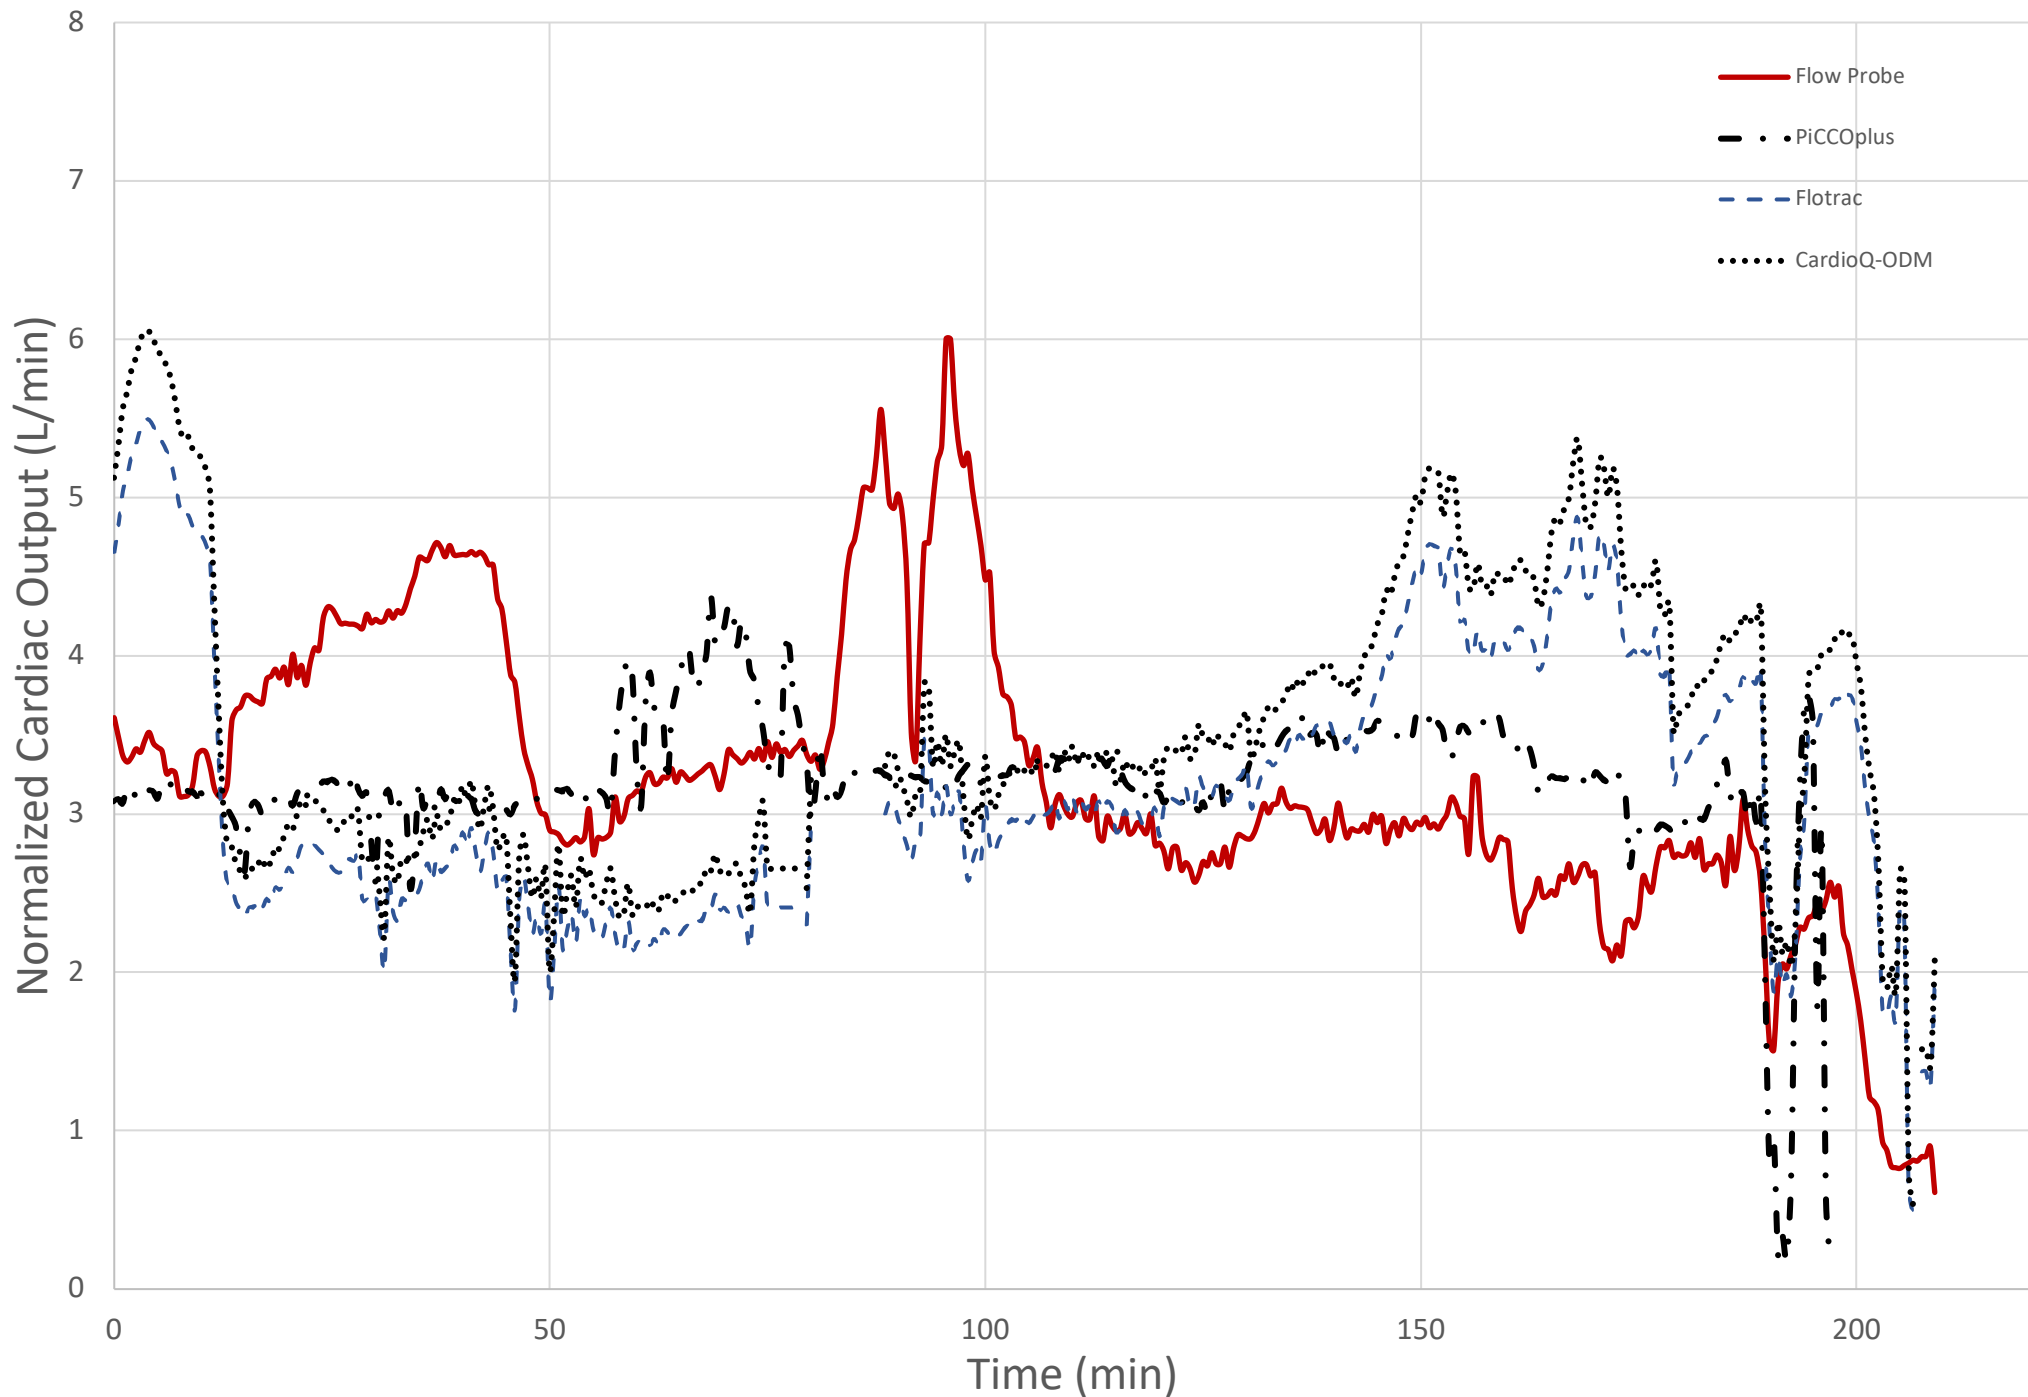

Flow over time as assessed by Aortic Root Flow Probe, PiCCOplus, CardioQ-ODM, and FloTrac. Animal 6

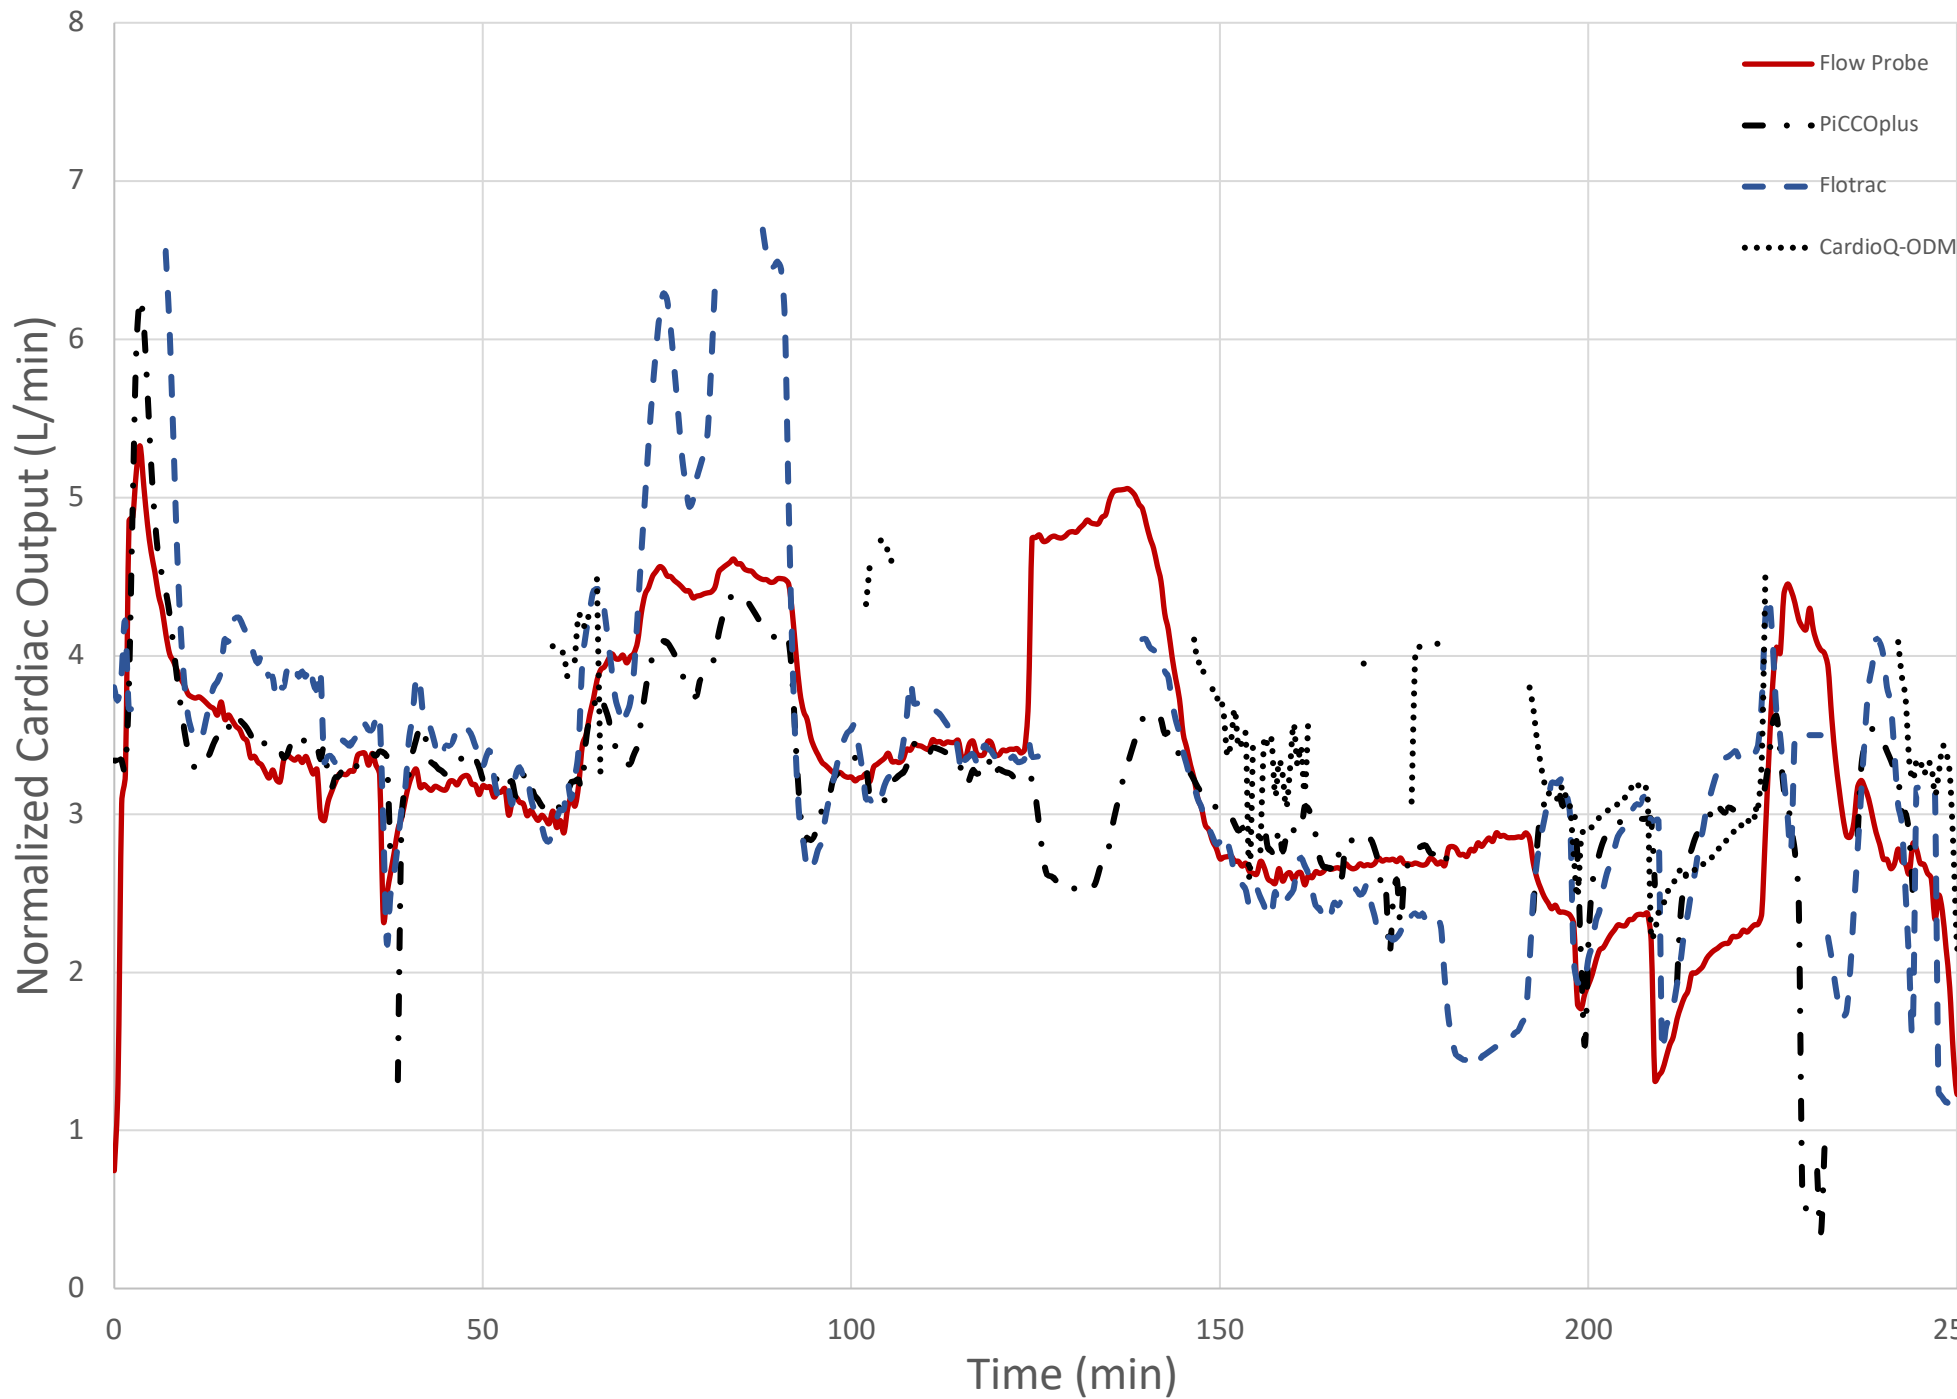

Flow over time as assessed by Aortic Root Flow Probe, PiCCOplus, and CardioQ-ODM. Animal 7

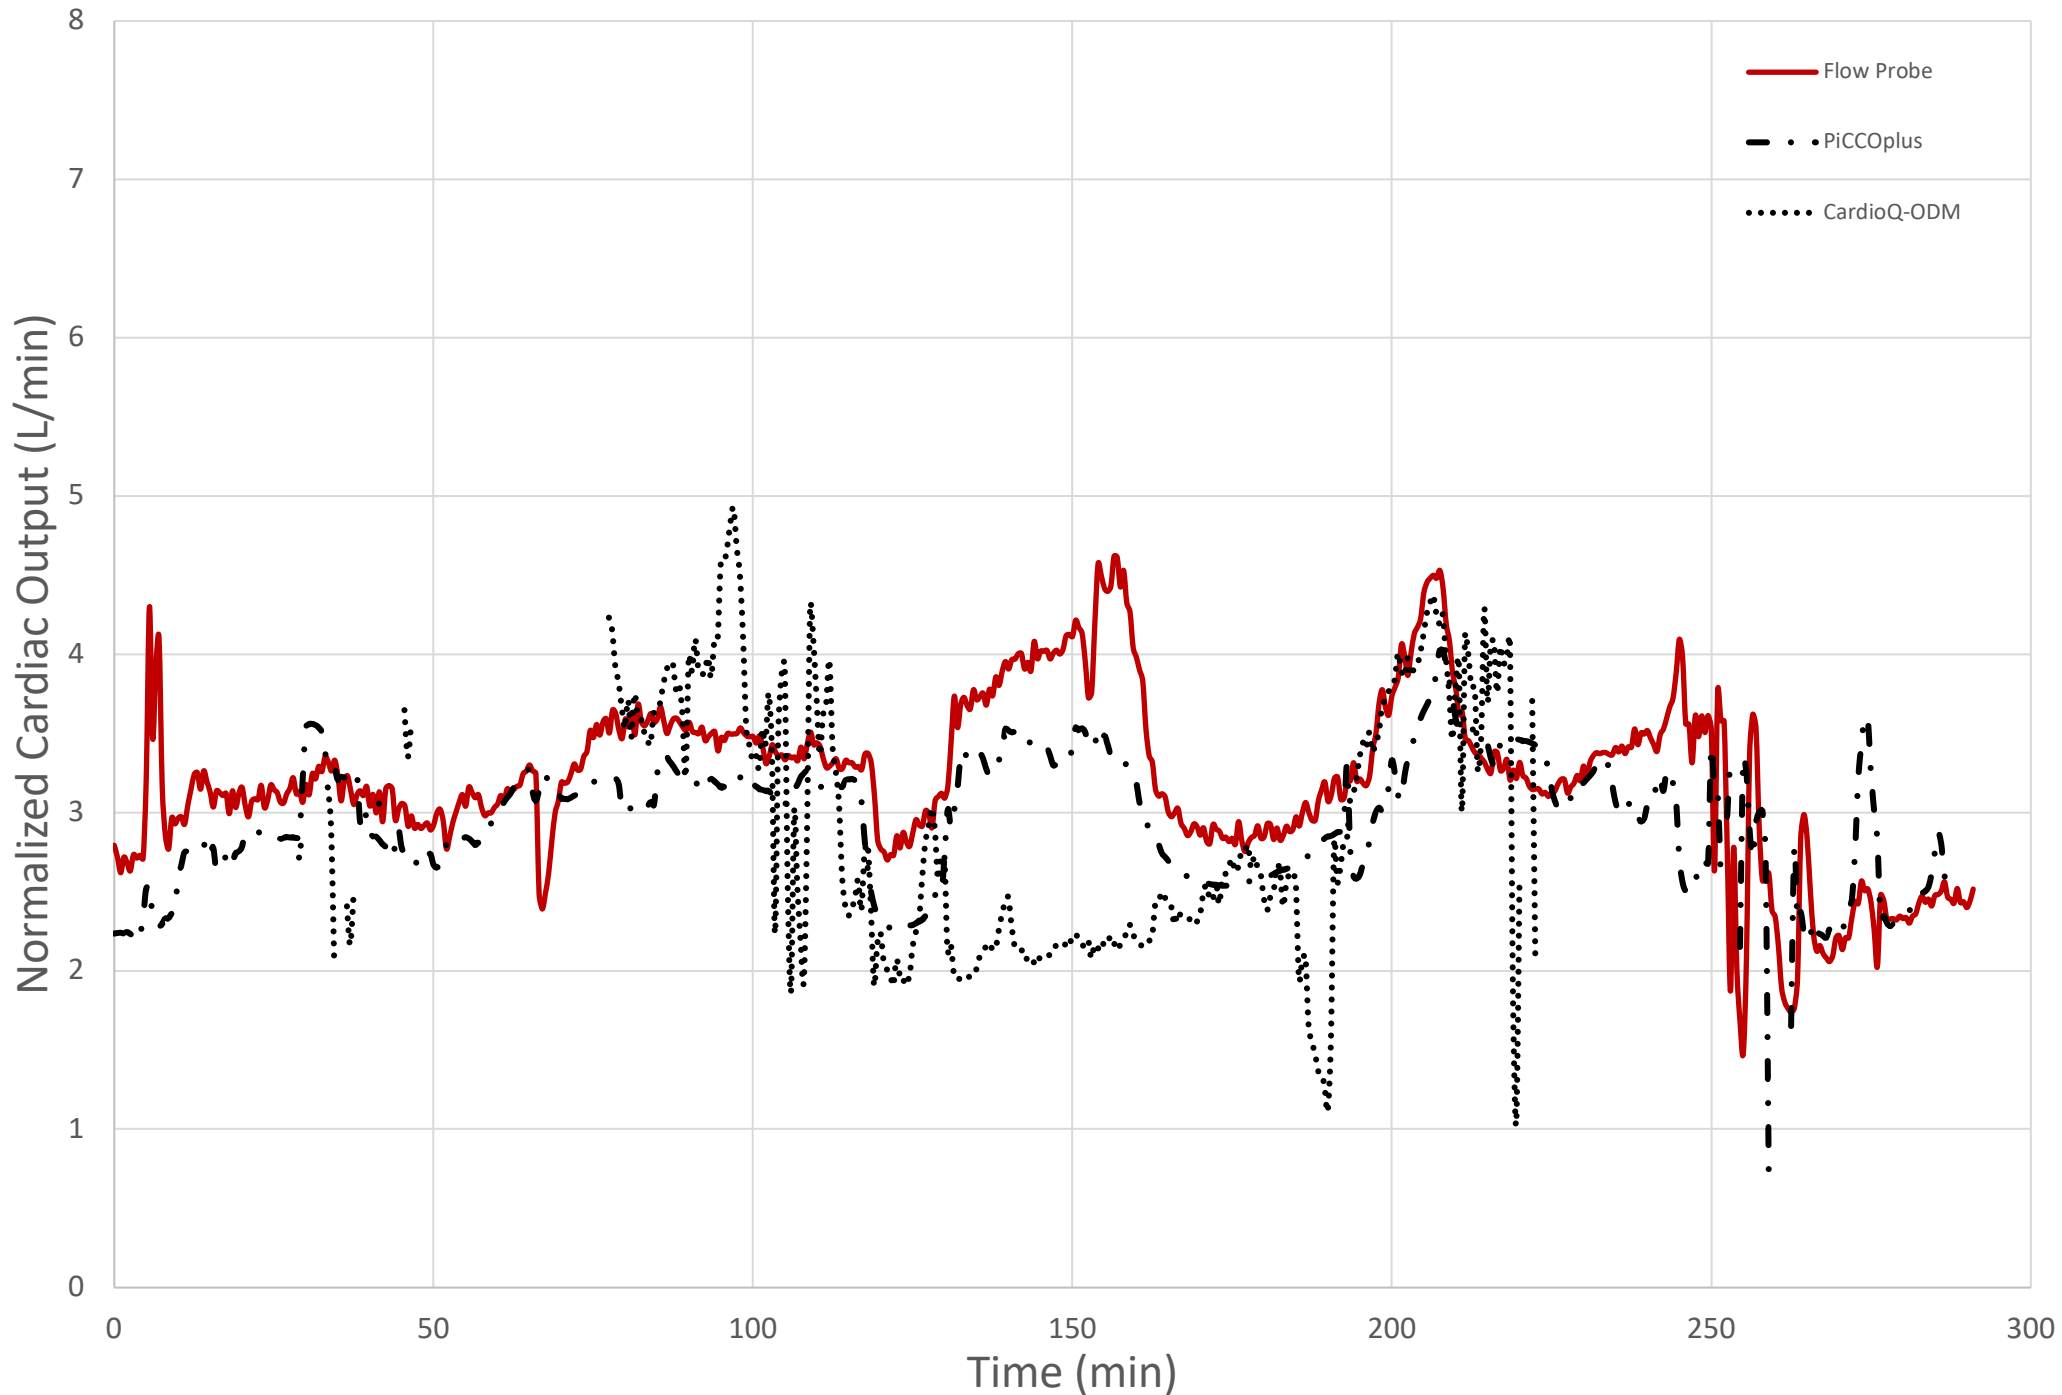

Flow over time as assessed by Aortic Root Flow Probe, PiCCOplus, CardioQ-ODM, and FloTrac. Animal 8

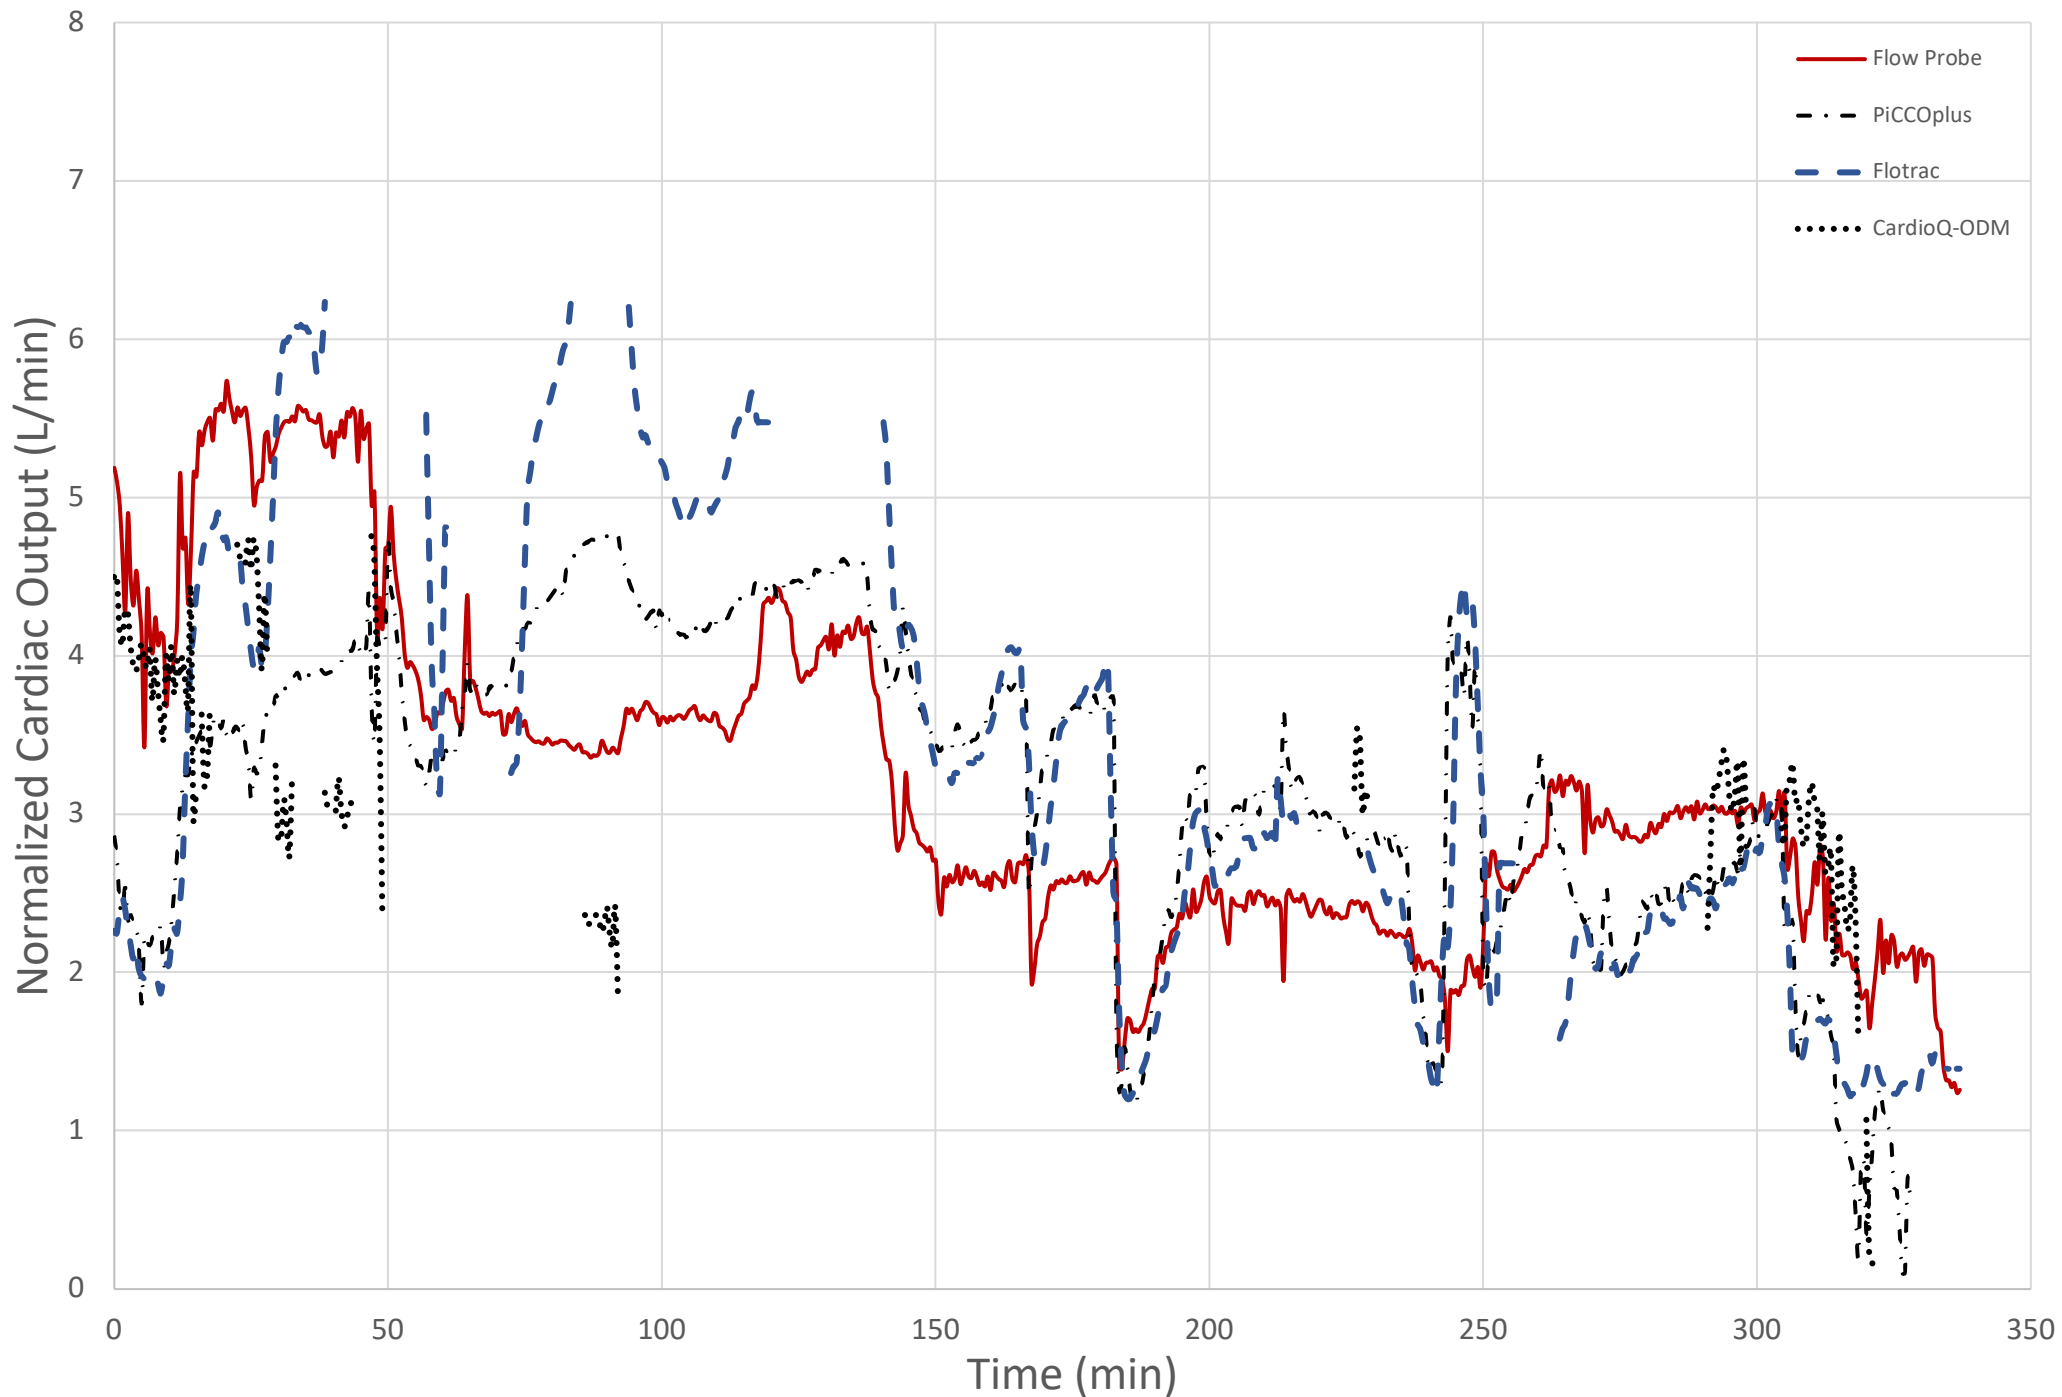

Flow over time as assessed by Aortic Root Flow Probe, PiCCOplus, CardioQ-ODM, and FloTrac. Animal 9

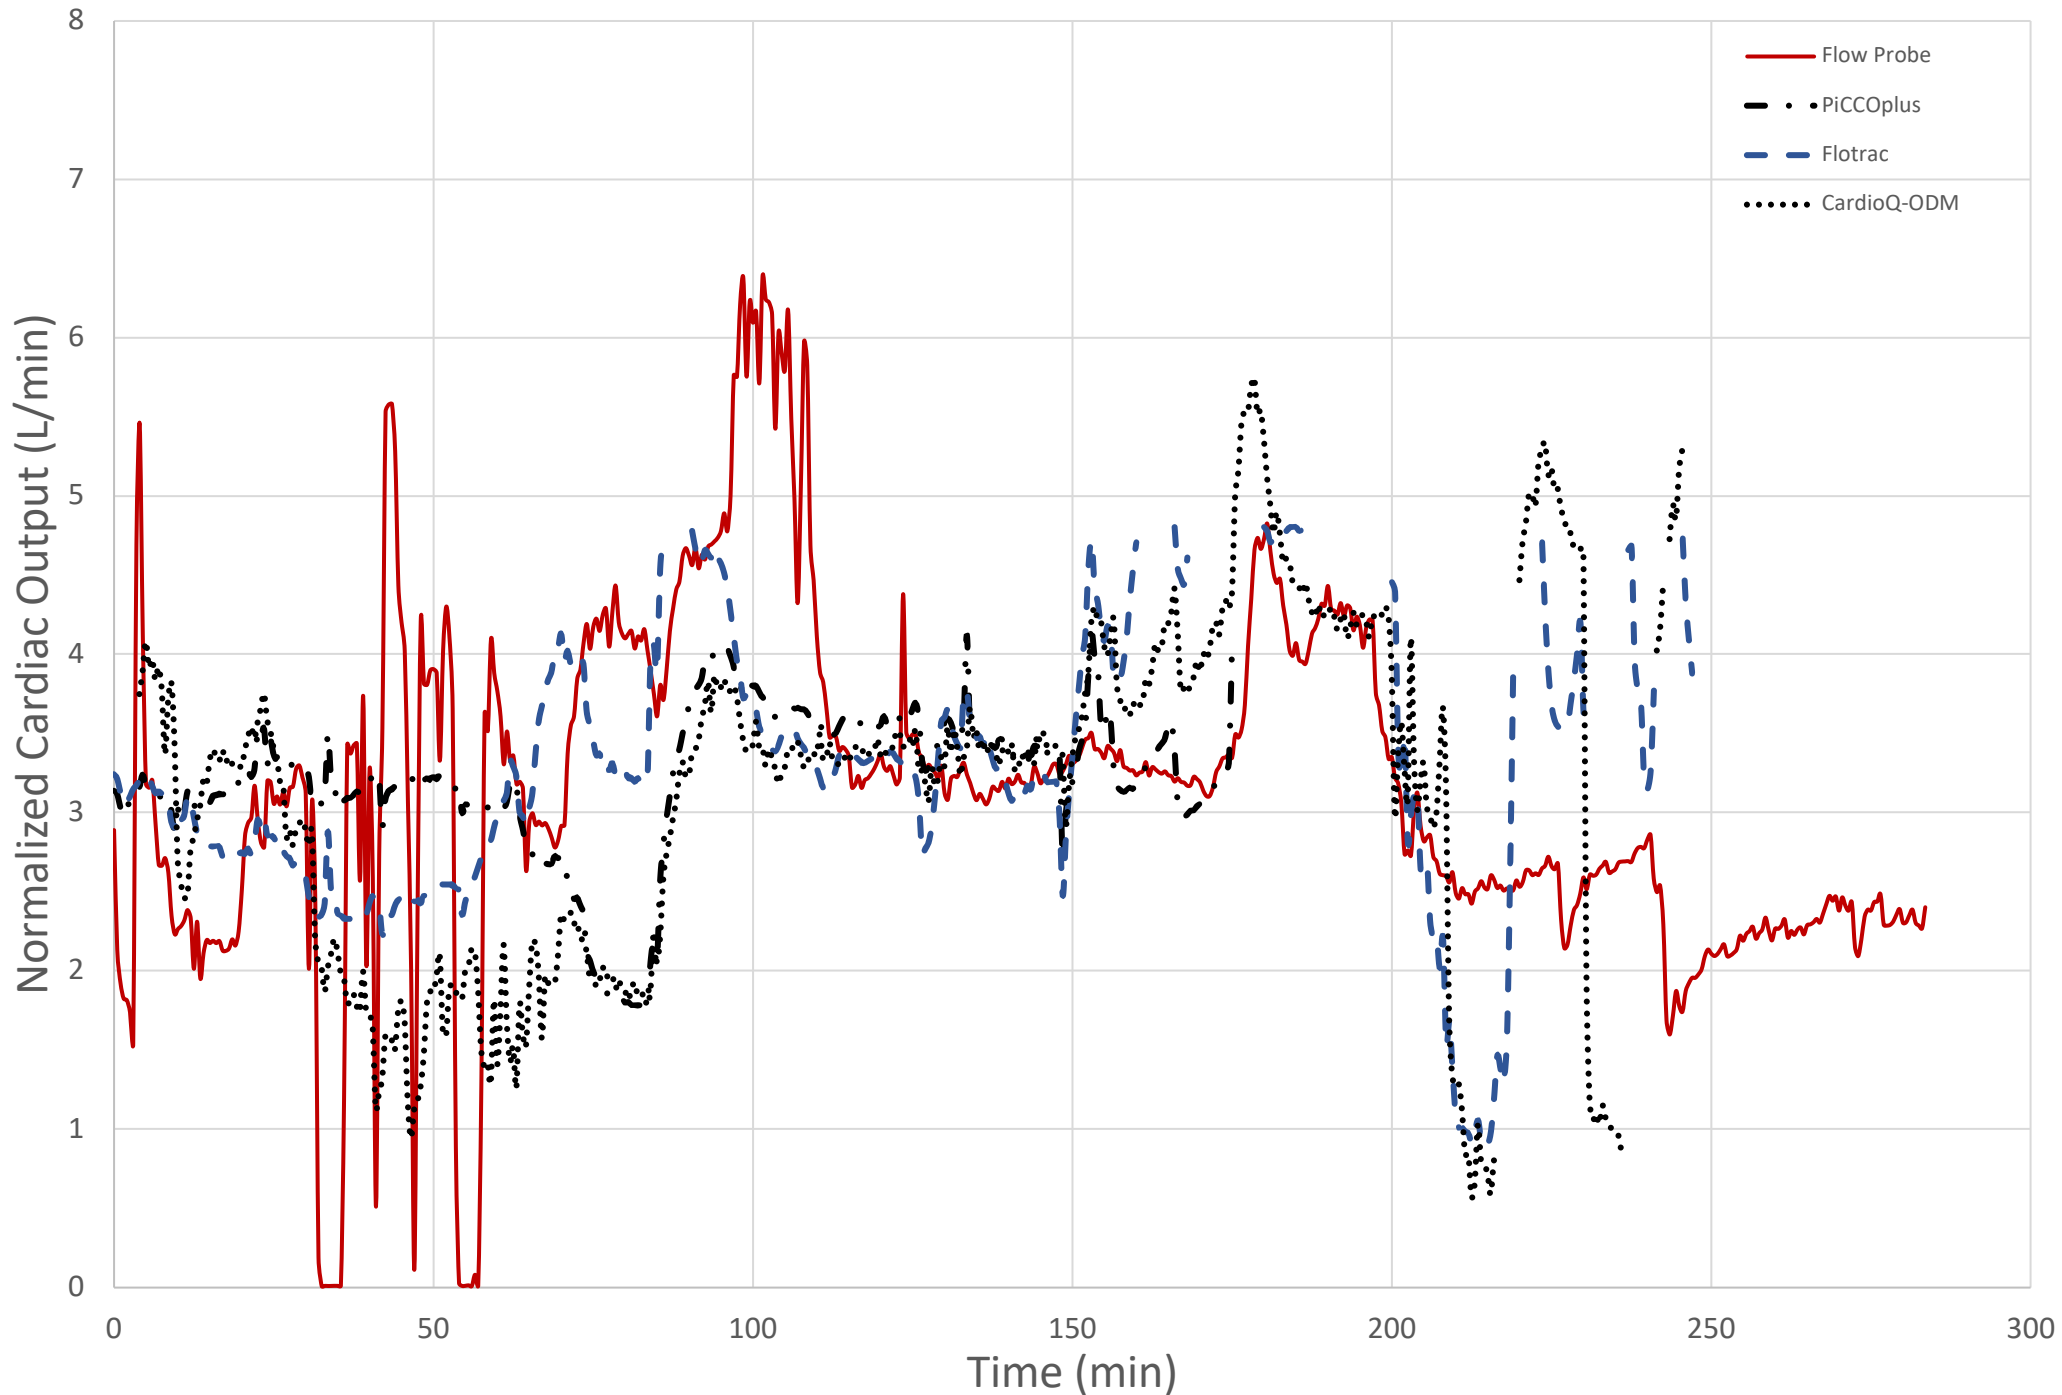



Flow over time as assessed by Aortic Root Flow Probe, PiCCOplus, CardioQ-ODM, and FloTrac. Animal 10

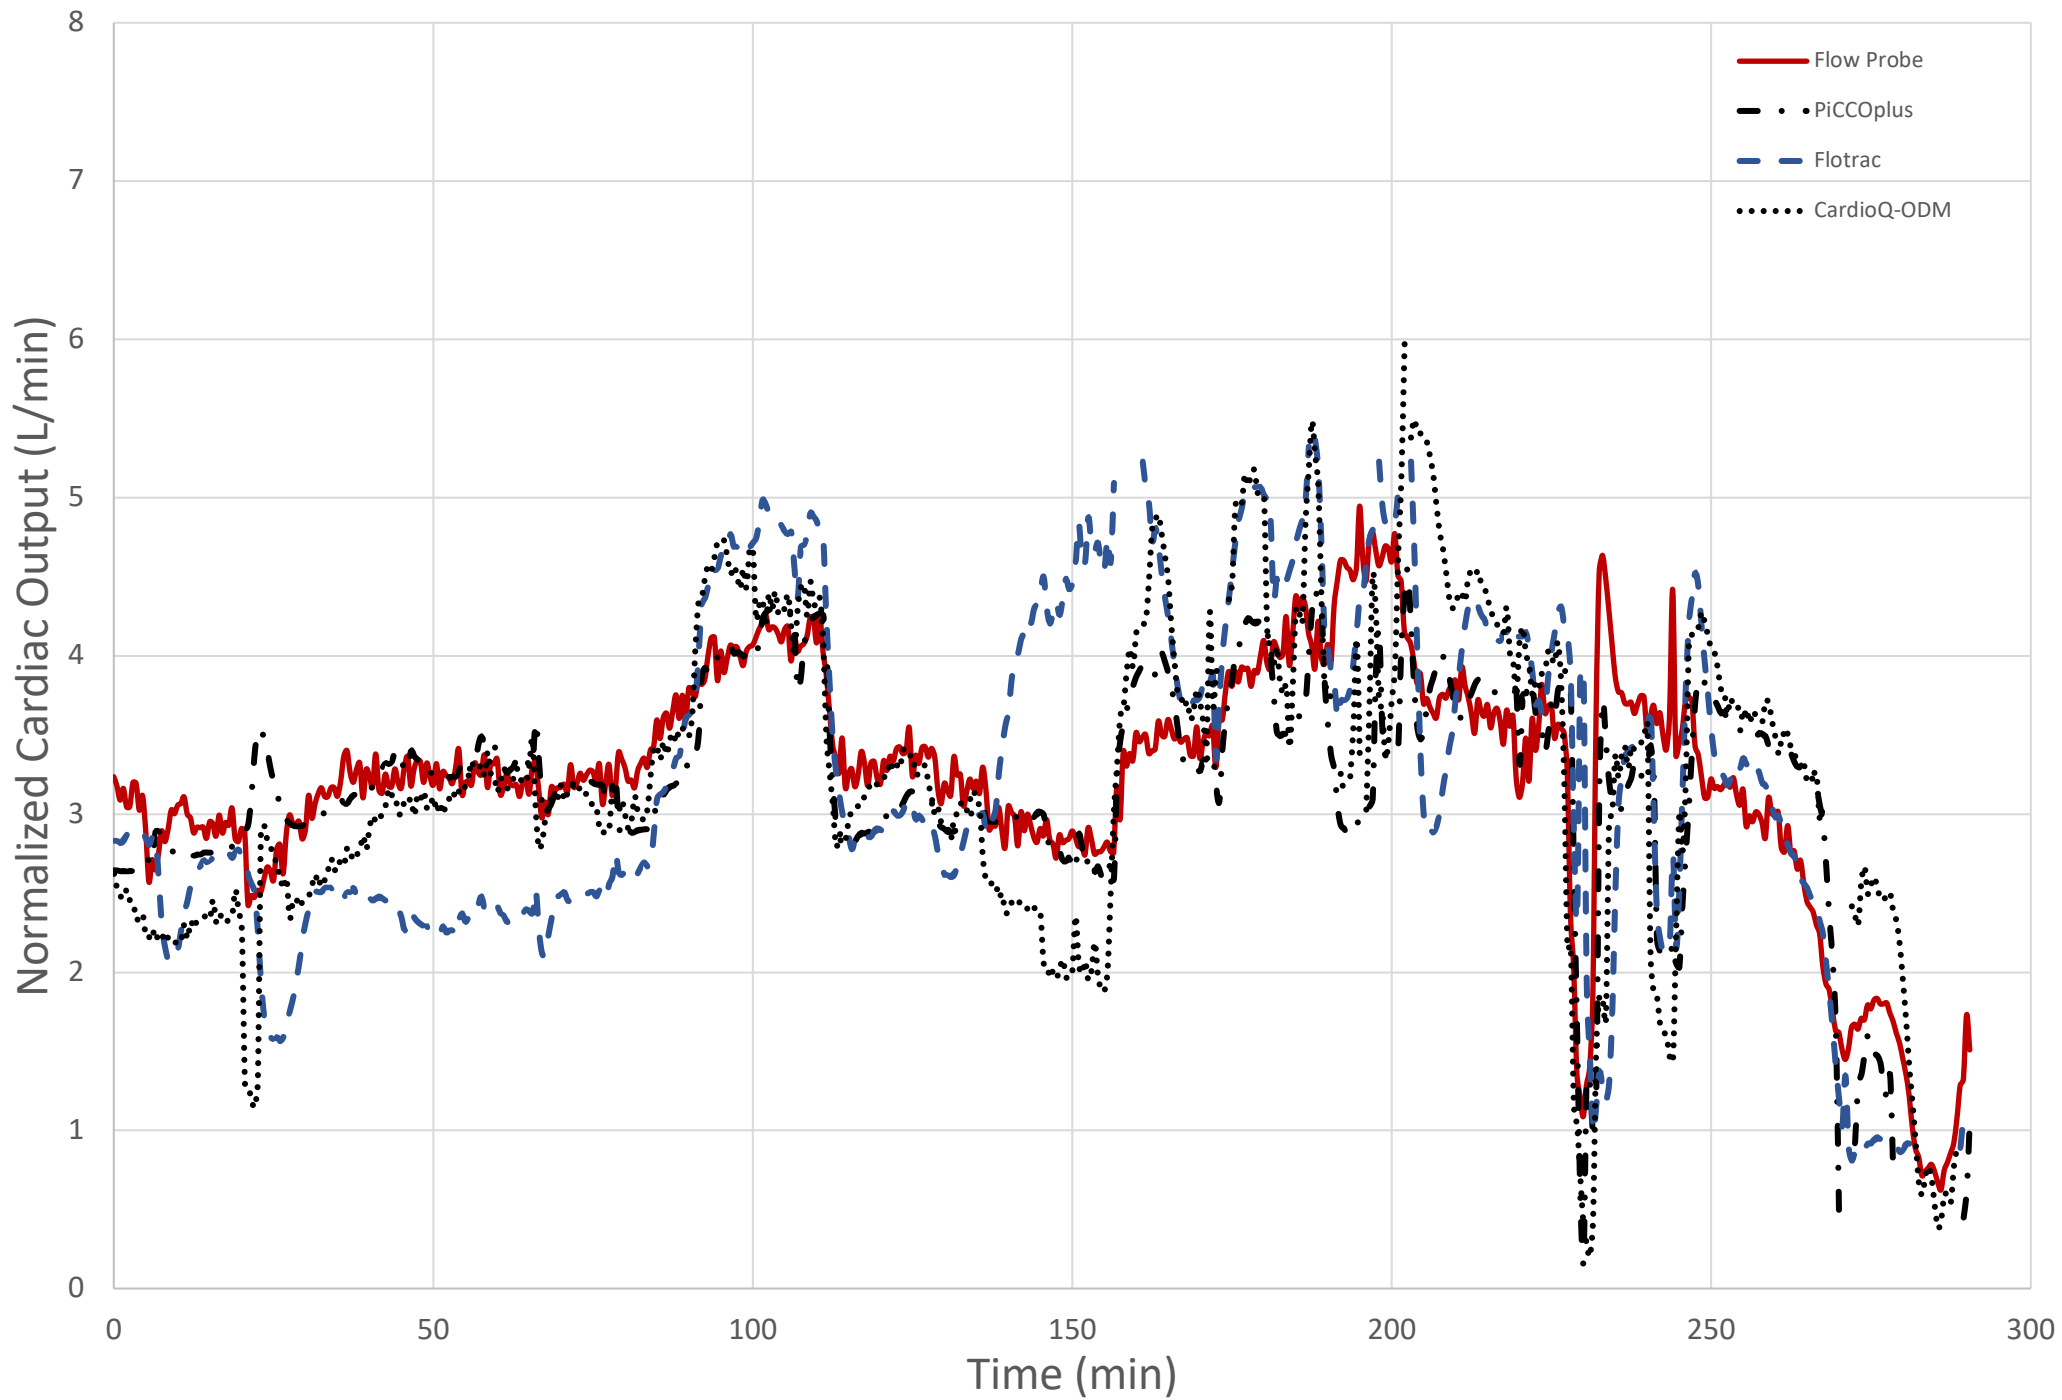

Flow over time as assessed by Aortic Root Flow Probe, PiCCOplus, CardioQ-ODM, and FloTrac. Animal 11

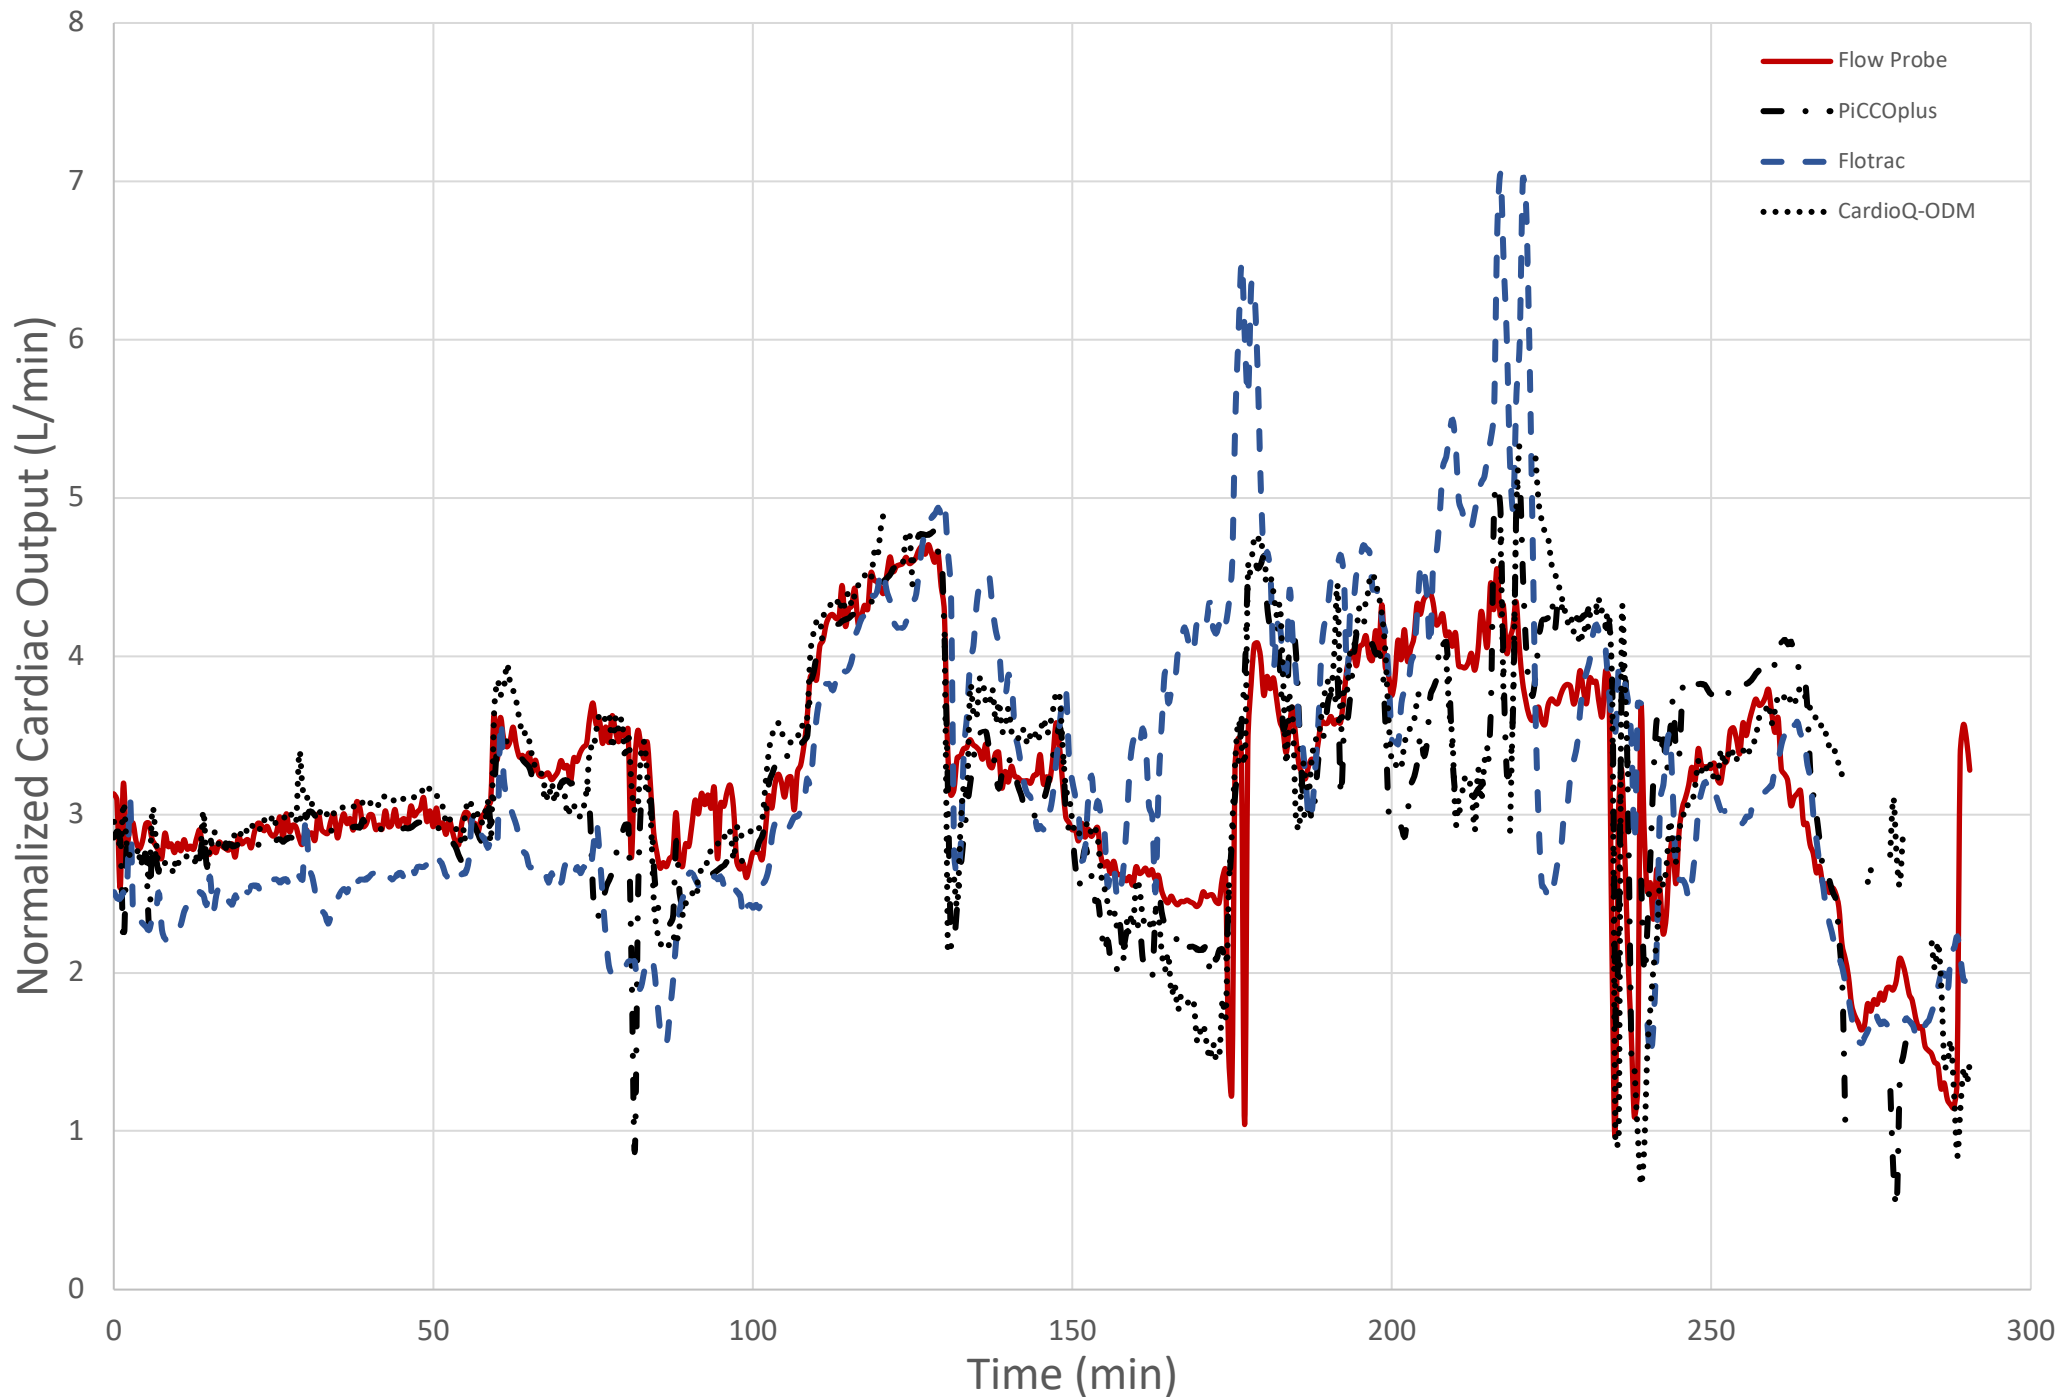

Flow over time as assessed by Aortic Root Flow Probe, PiCCOplus, CardioQ-ODM, and FloTrac. Animal 12

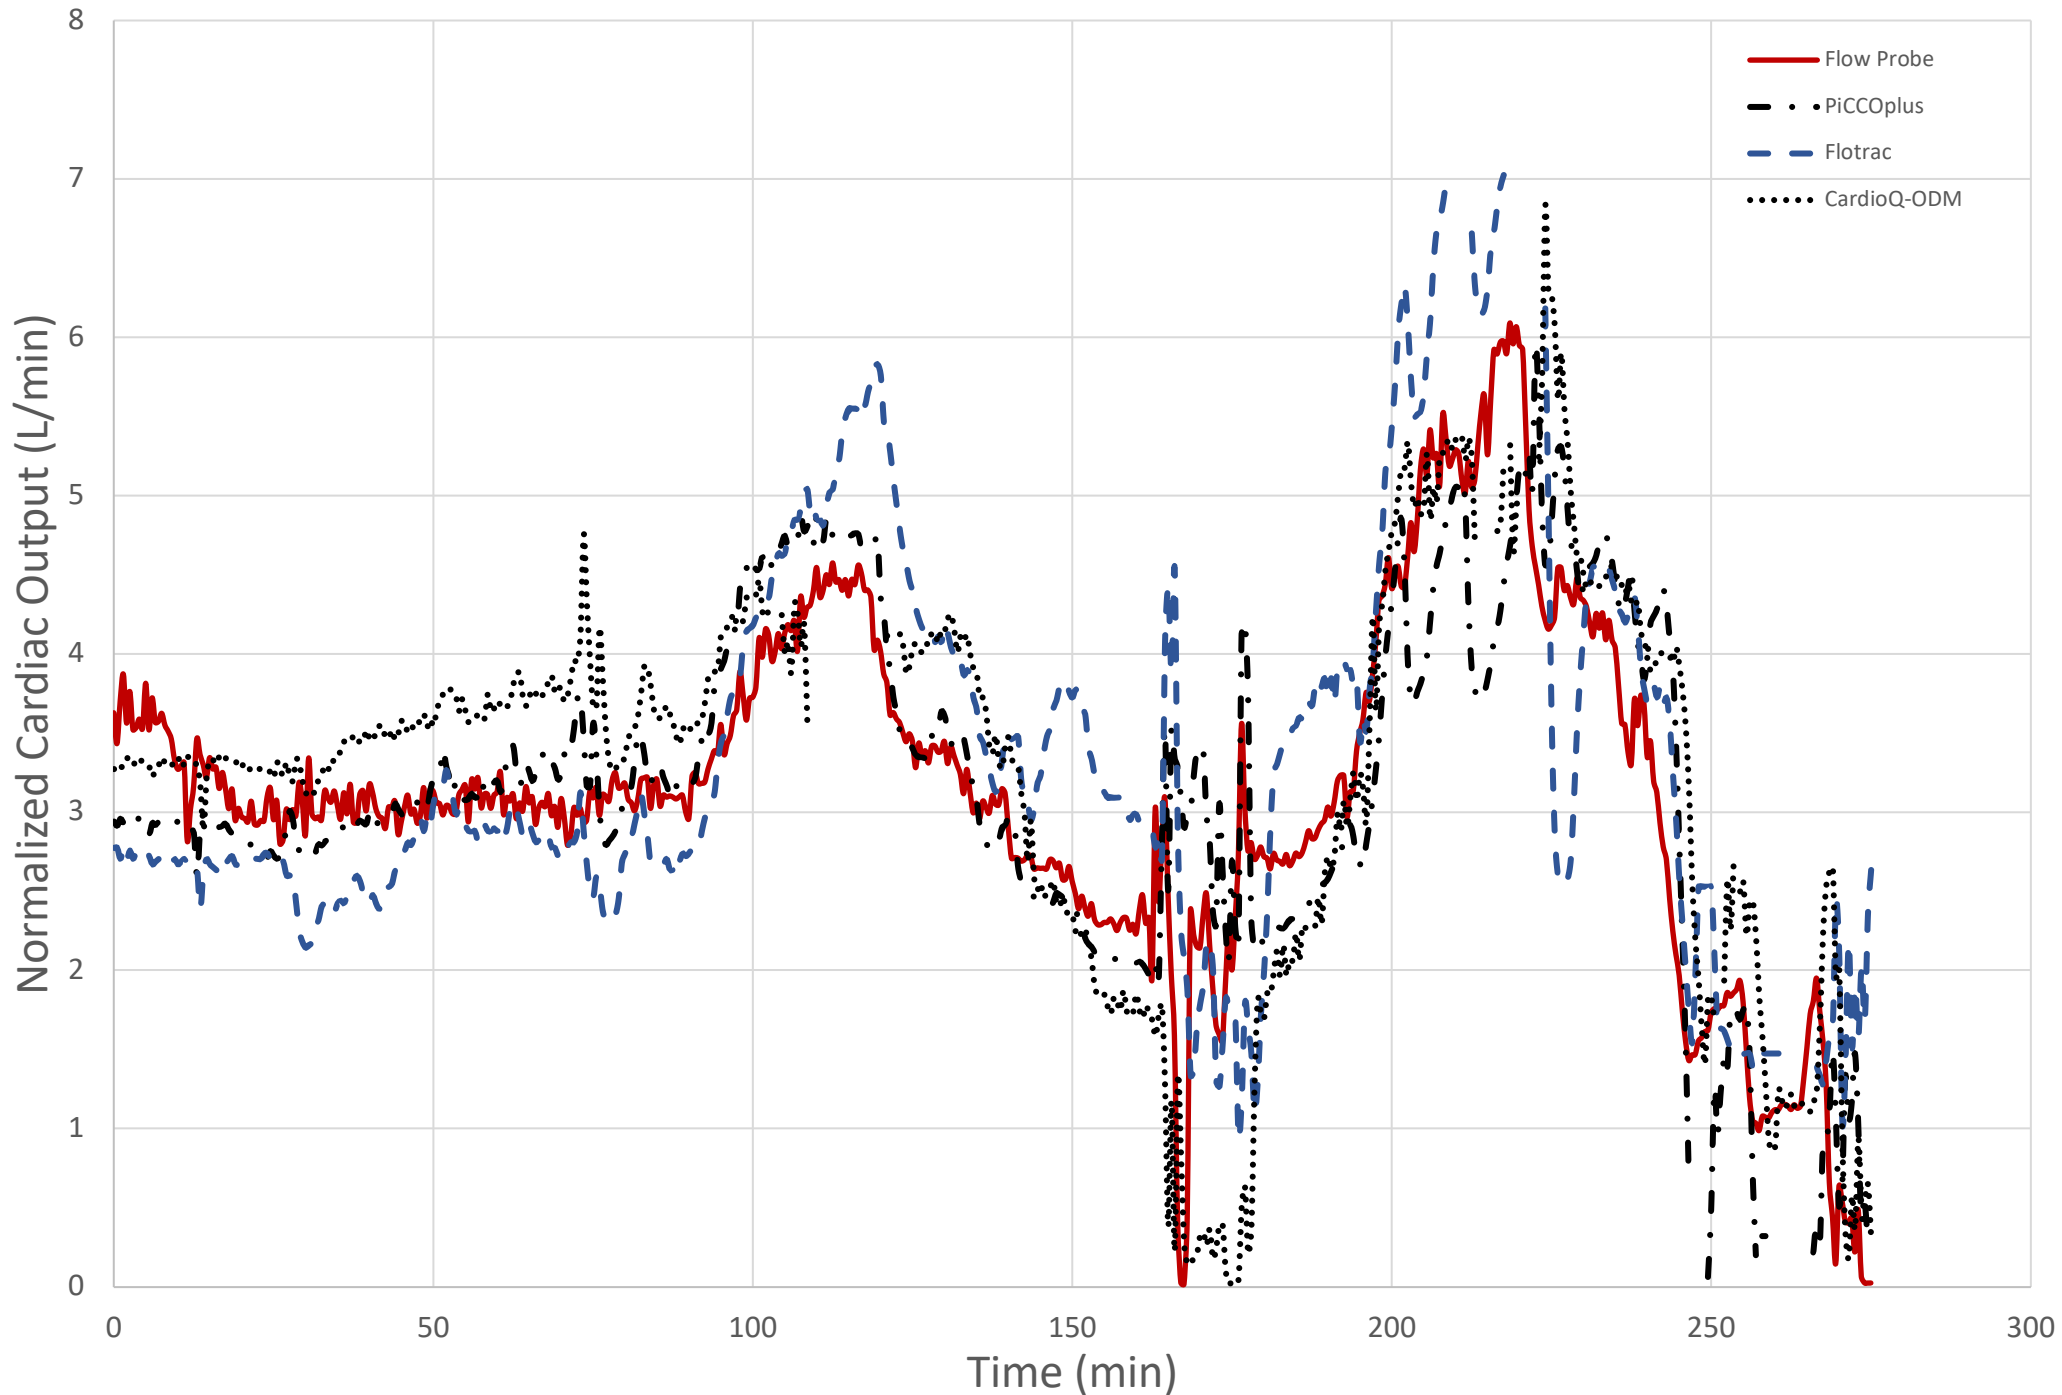

Flow over time as assessed by Aortic Root Flow Probe, PiCCOplus, CardioQ-ODM, and FloTracAll Animals

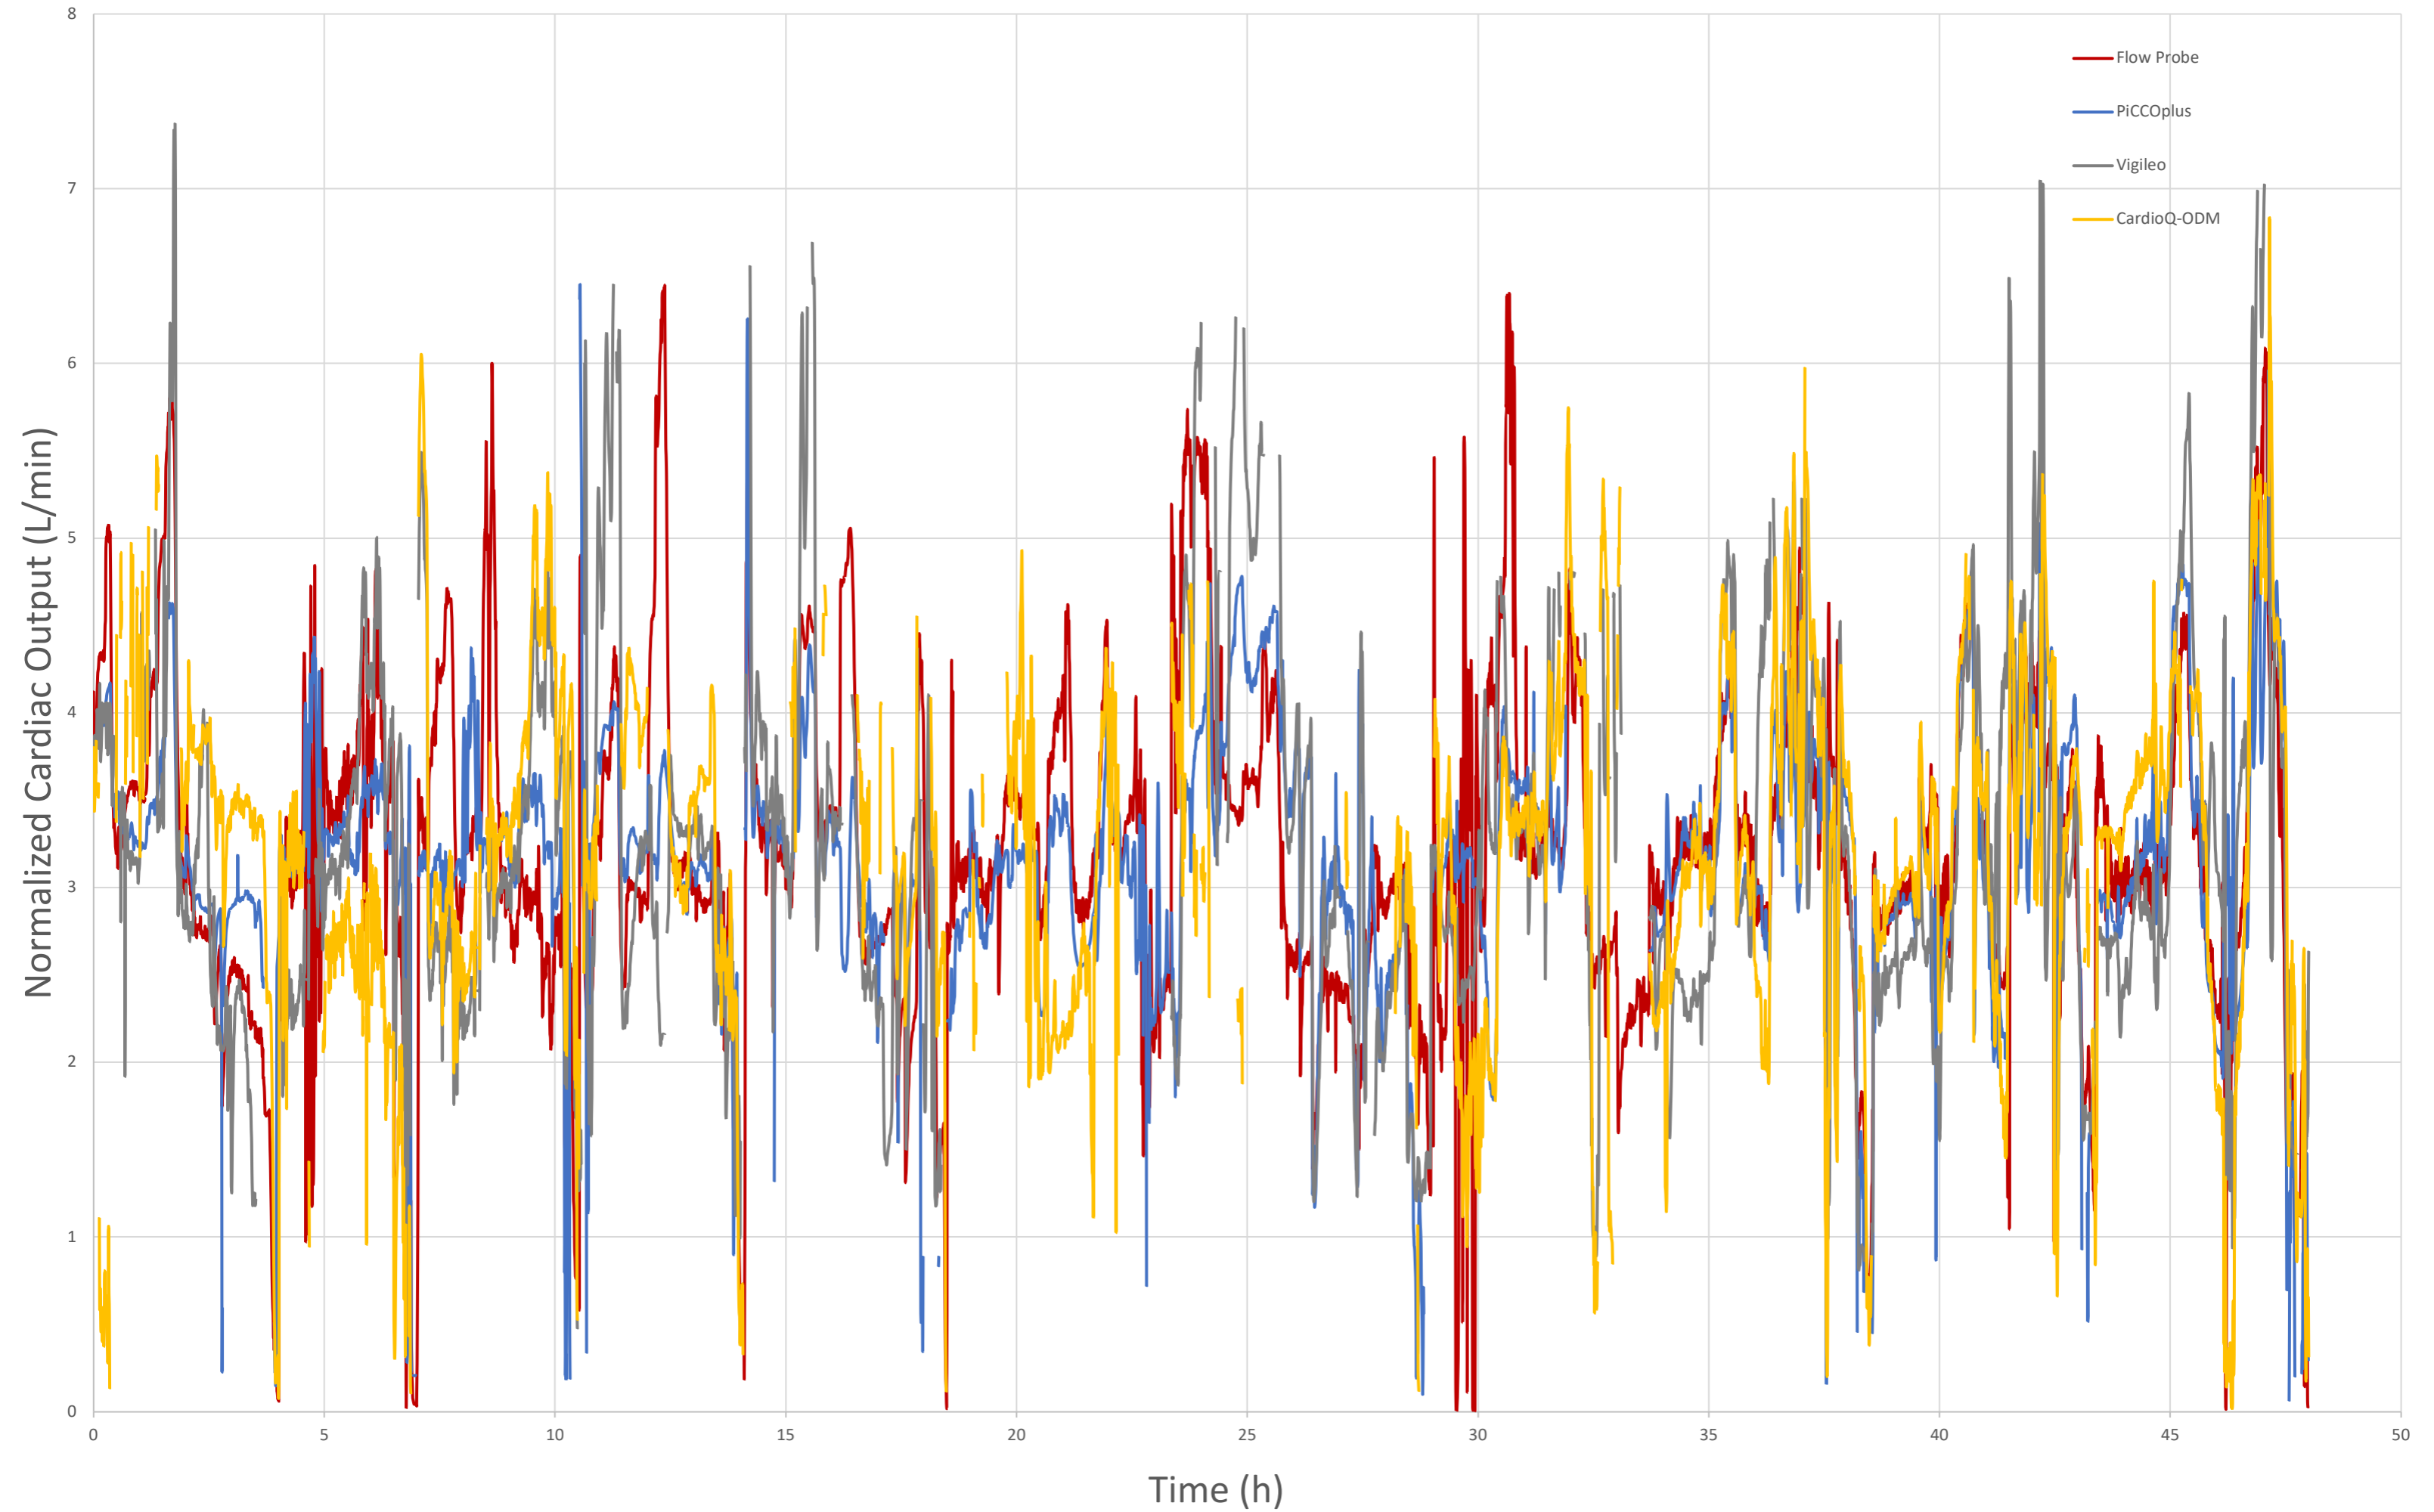

Scatter Plot - PiCCOplus vs Aortic Root Flow Probe. All Flows

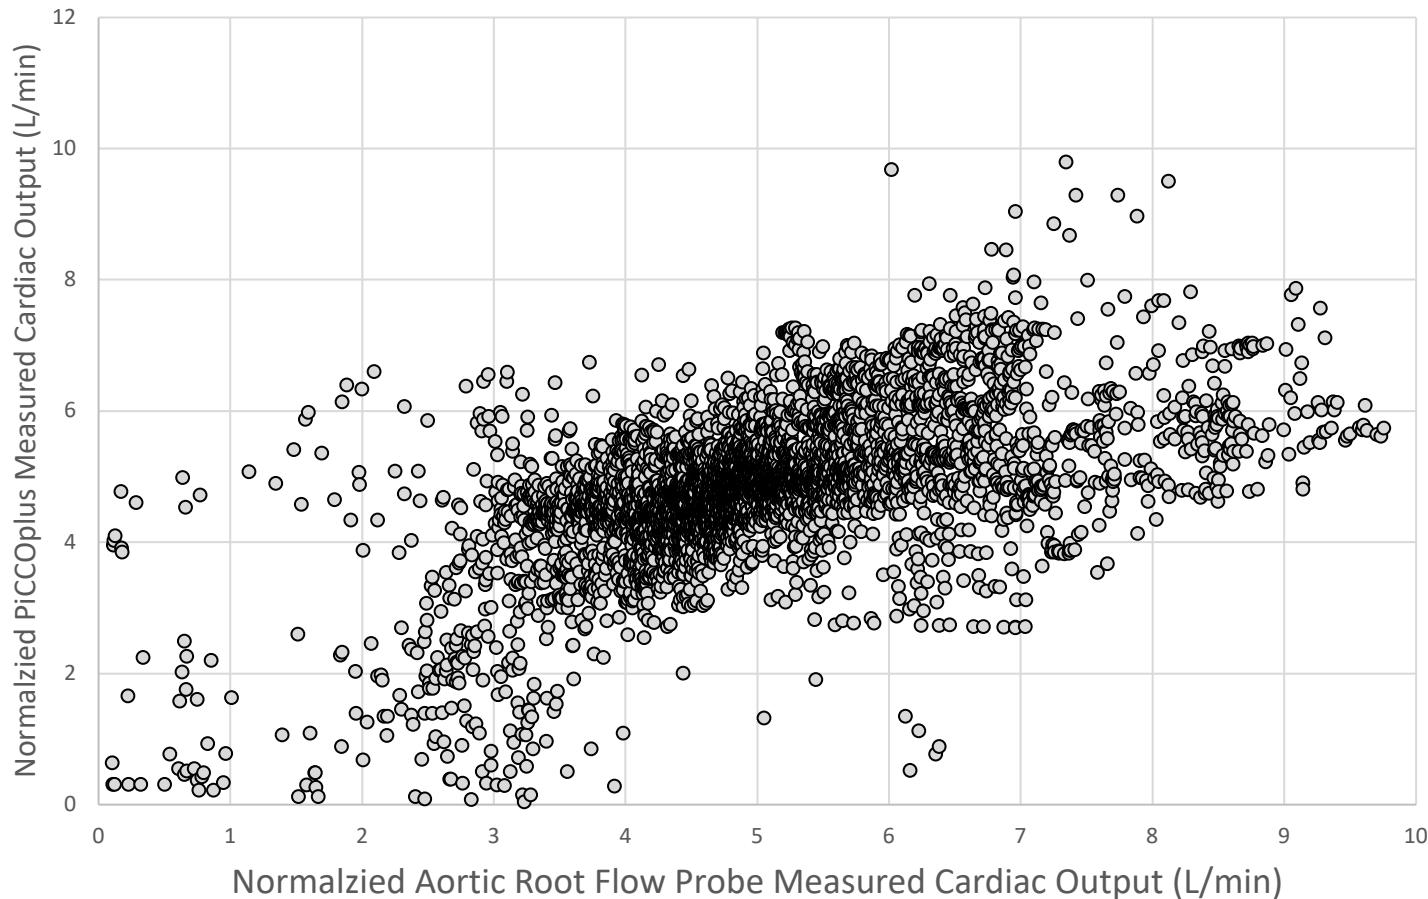

Scatter Plot - Flotrac vs Aortic Root Flow Probe. All Flows

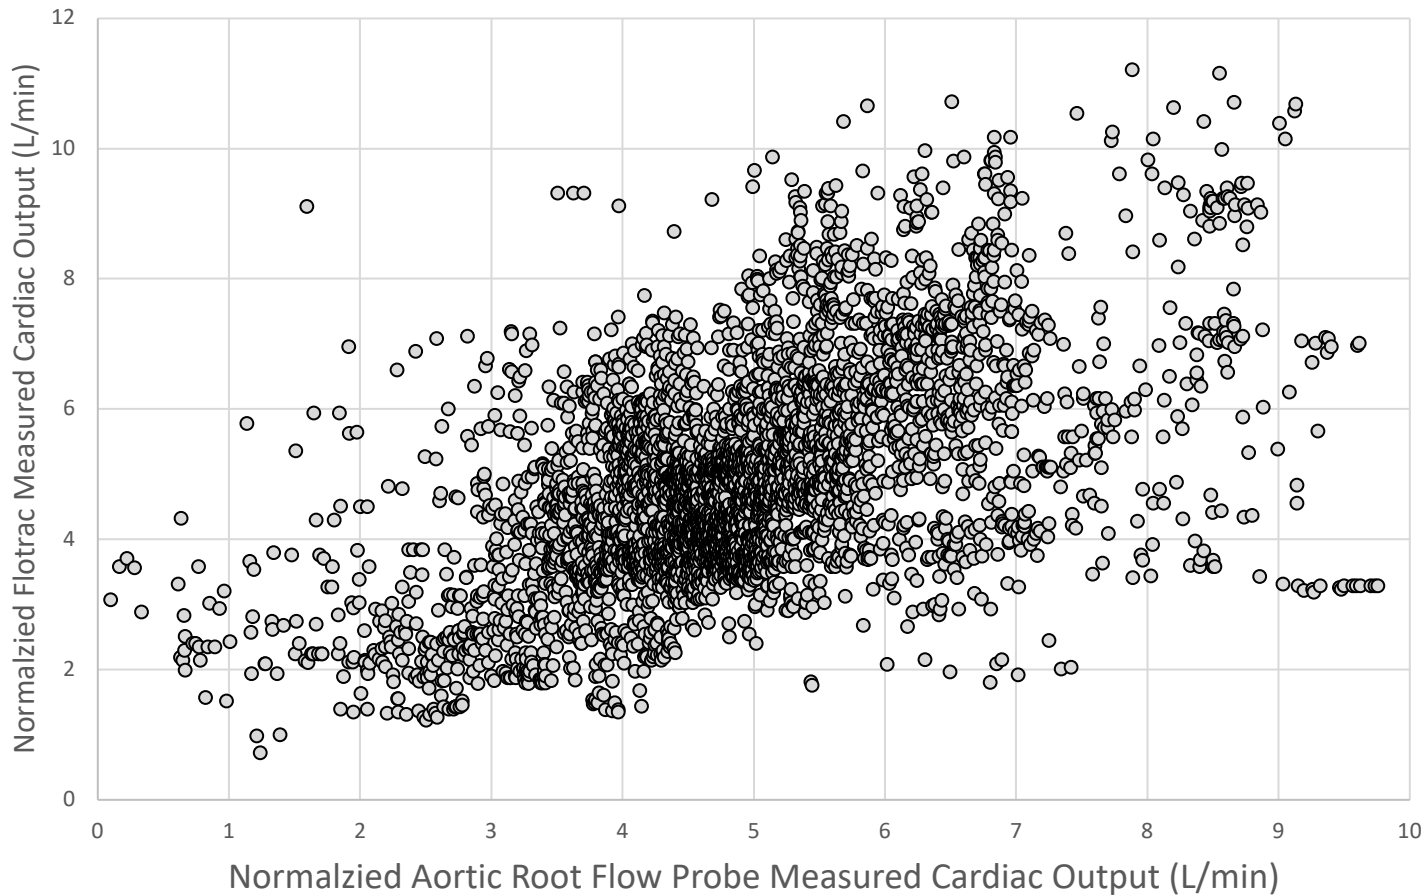

Scatter Plot - CardioQ-ODM vs Aortic Root Flow Probe. All Flows

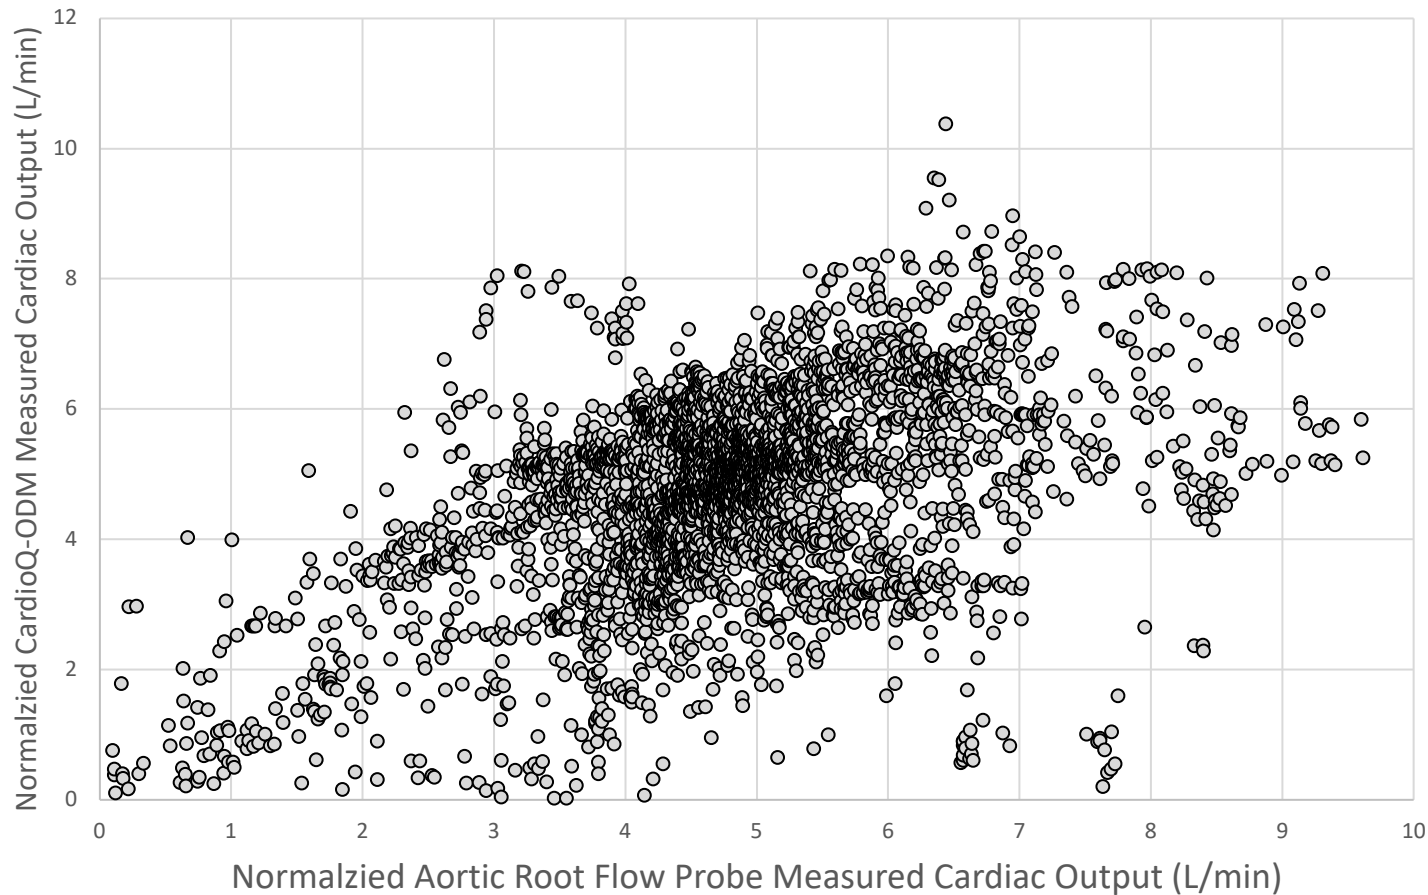

Scatter Plot - Mean Arterial Pressure vs Aortic Root Flow Probe. All Flows

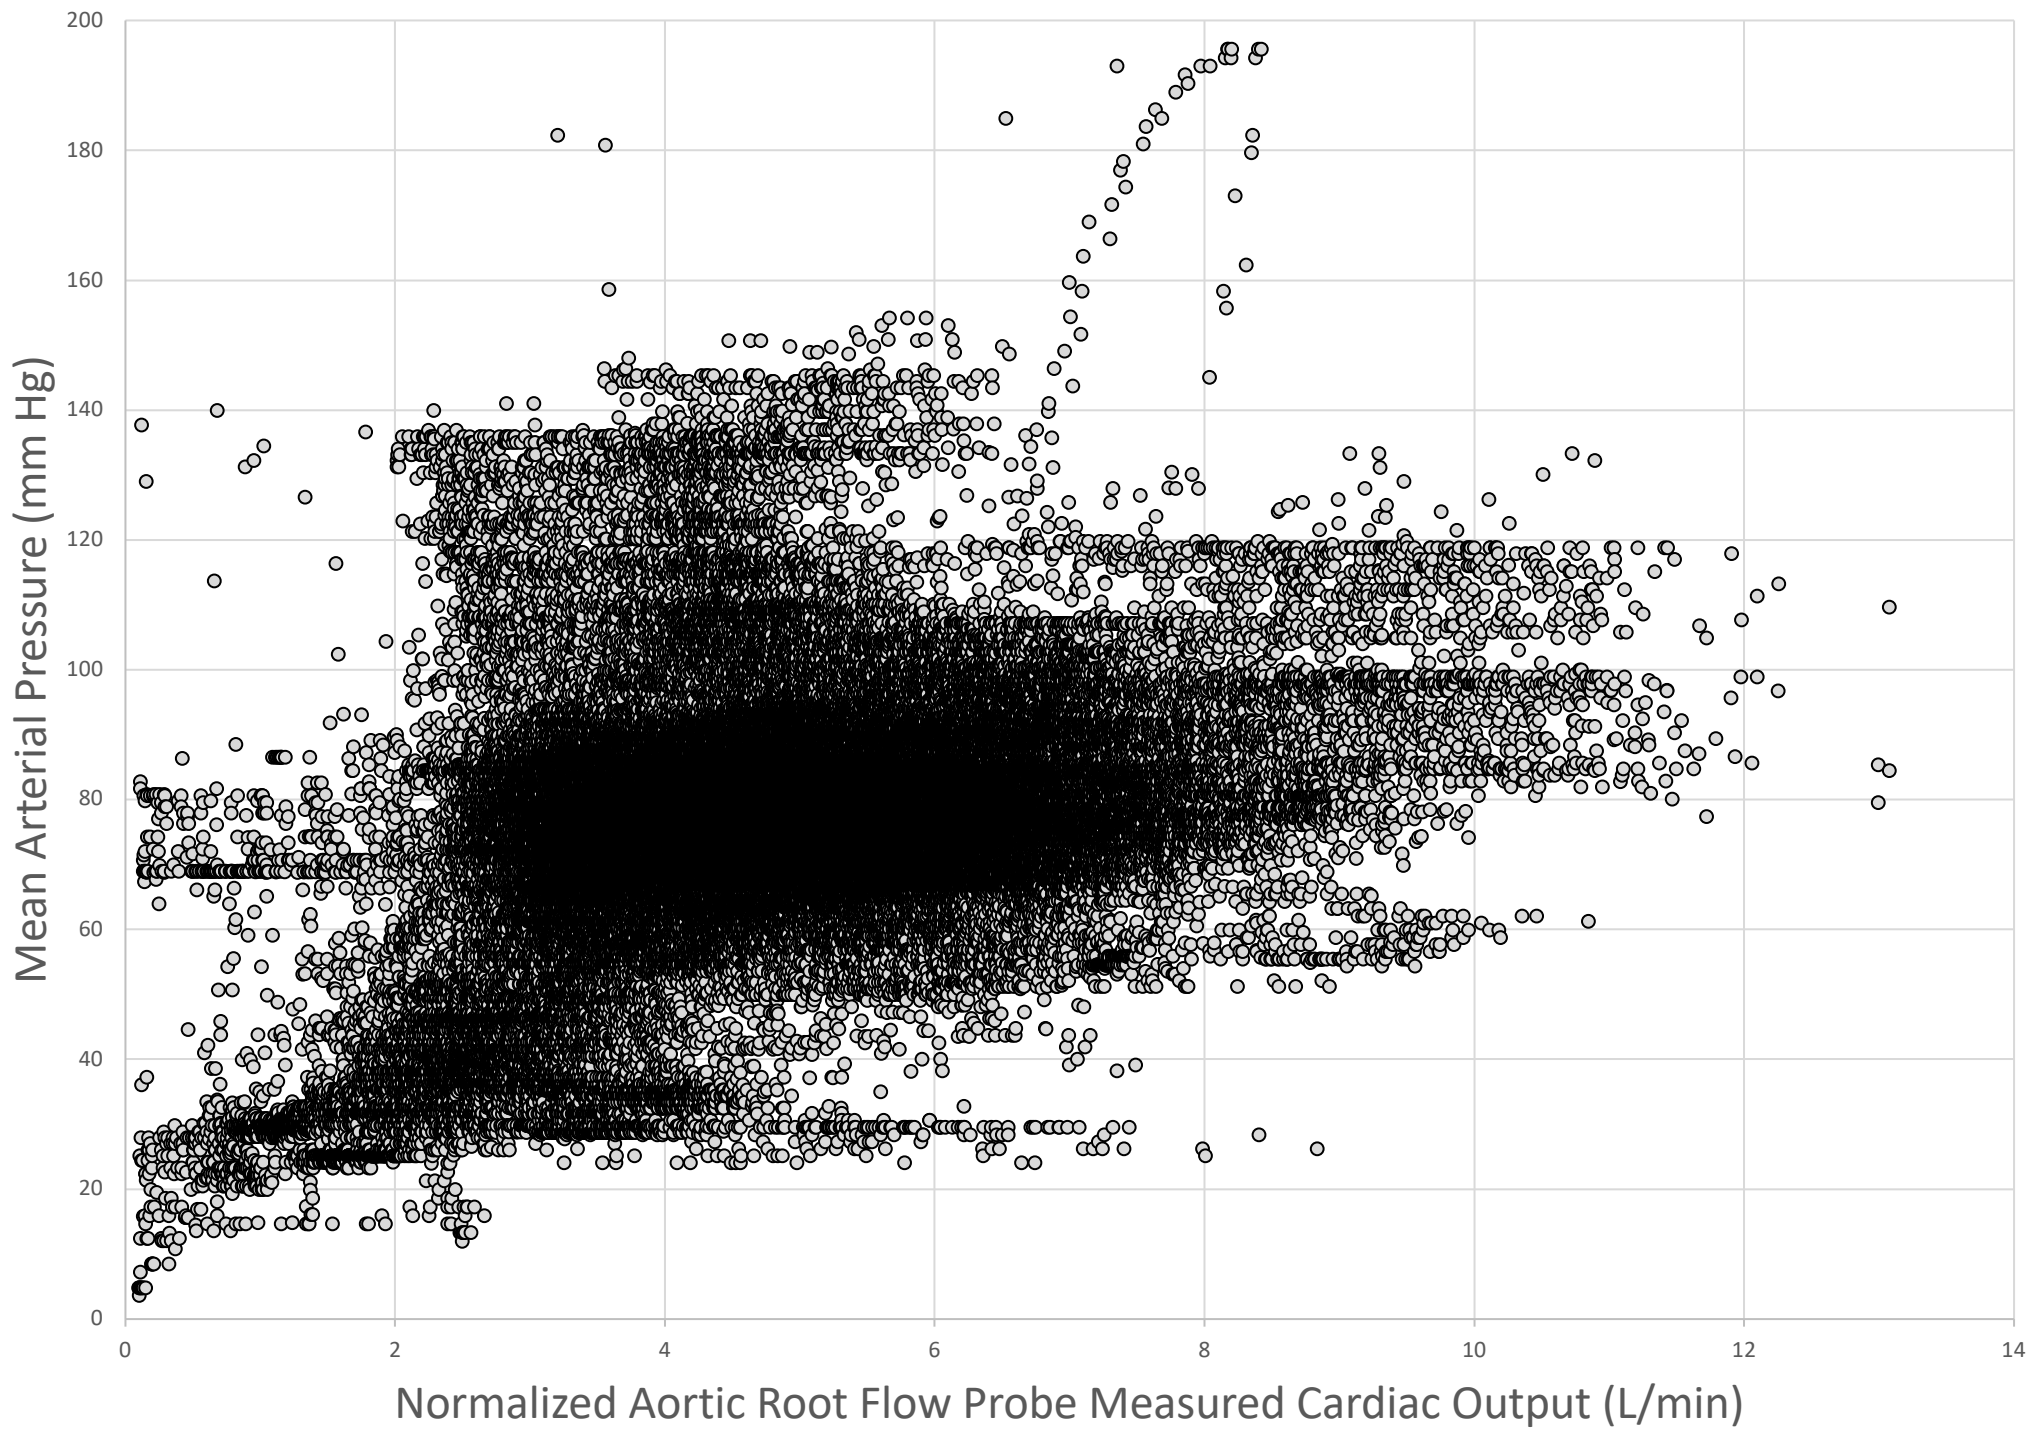



4 Quadrant Plot -  $\Delta$ PiCCOplus vs  $\Delta$  Aortic Root Flow Probe. All Flows

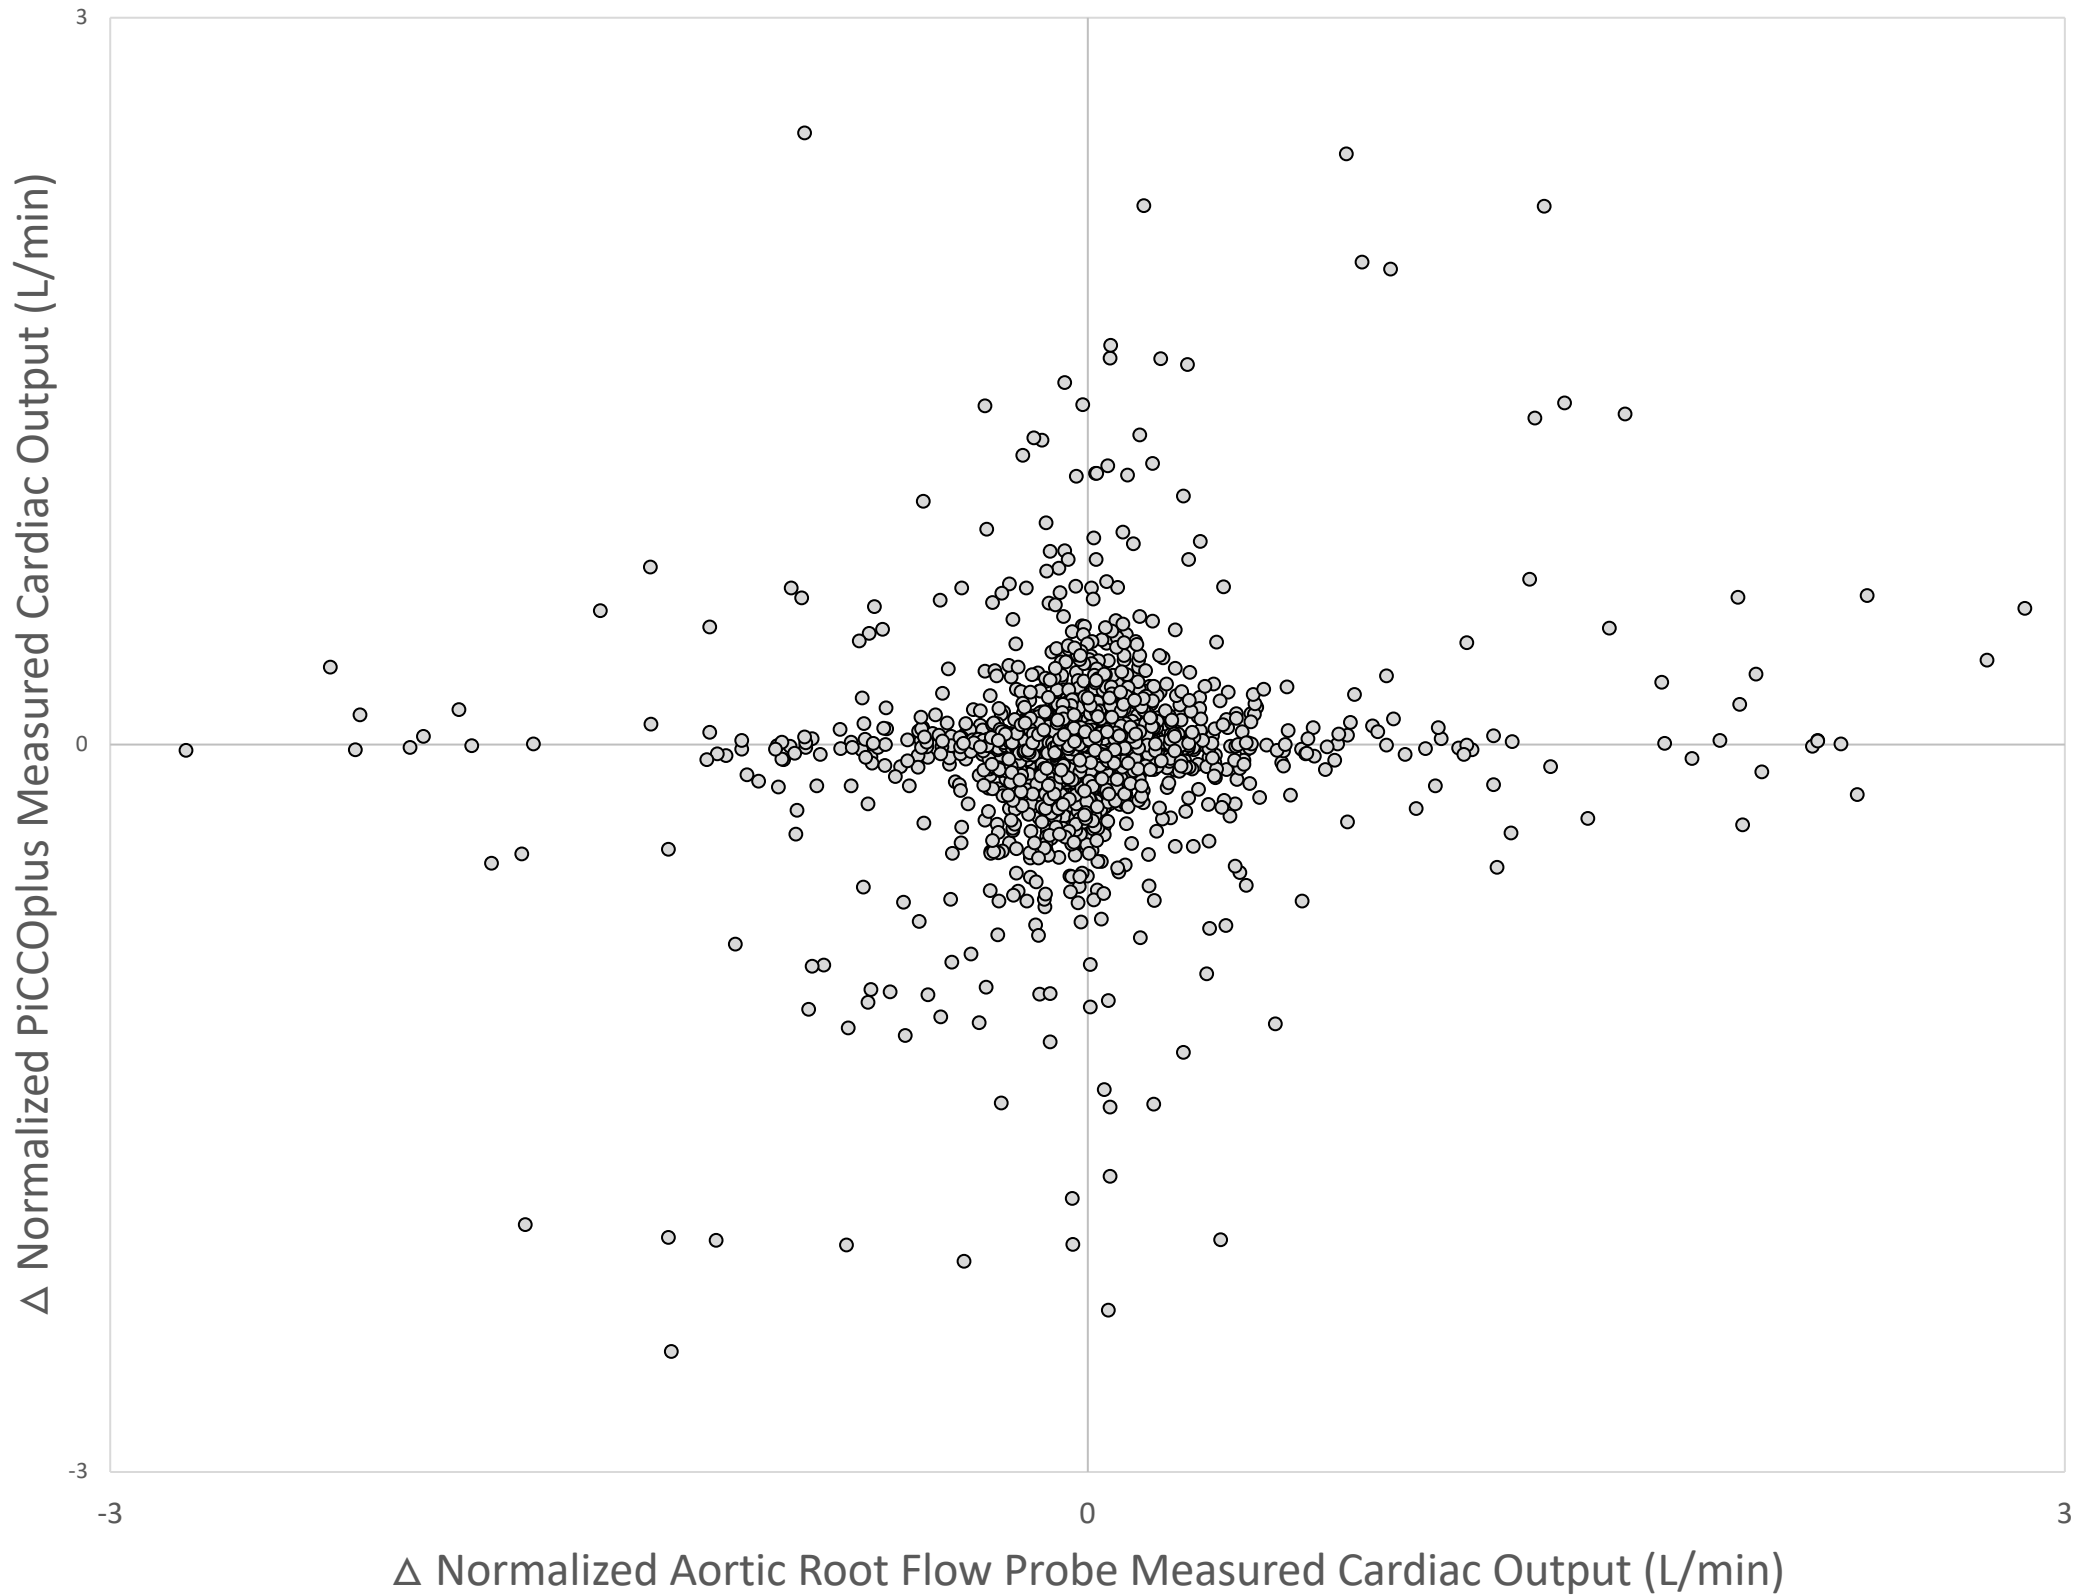

4 Quadrant Plot -  $\Delta$ PiCCOplus vs  $\Delta$  Aortic Root Flow Probe. Low Flows

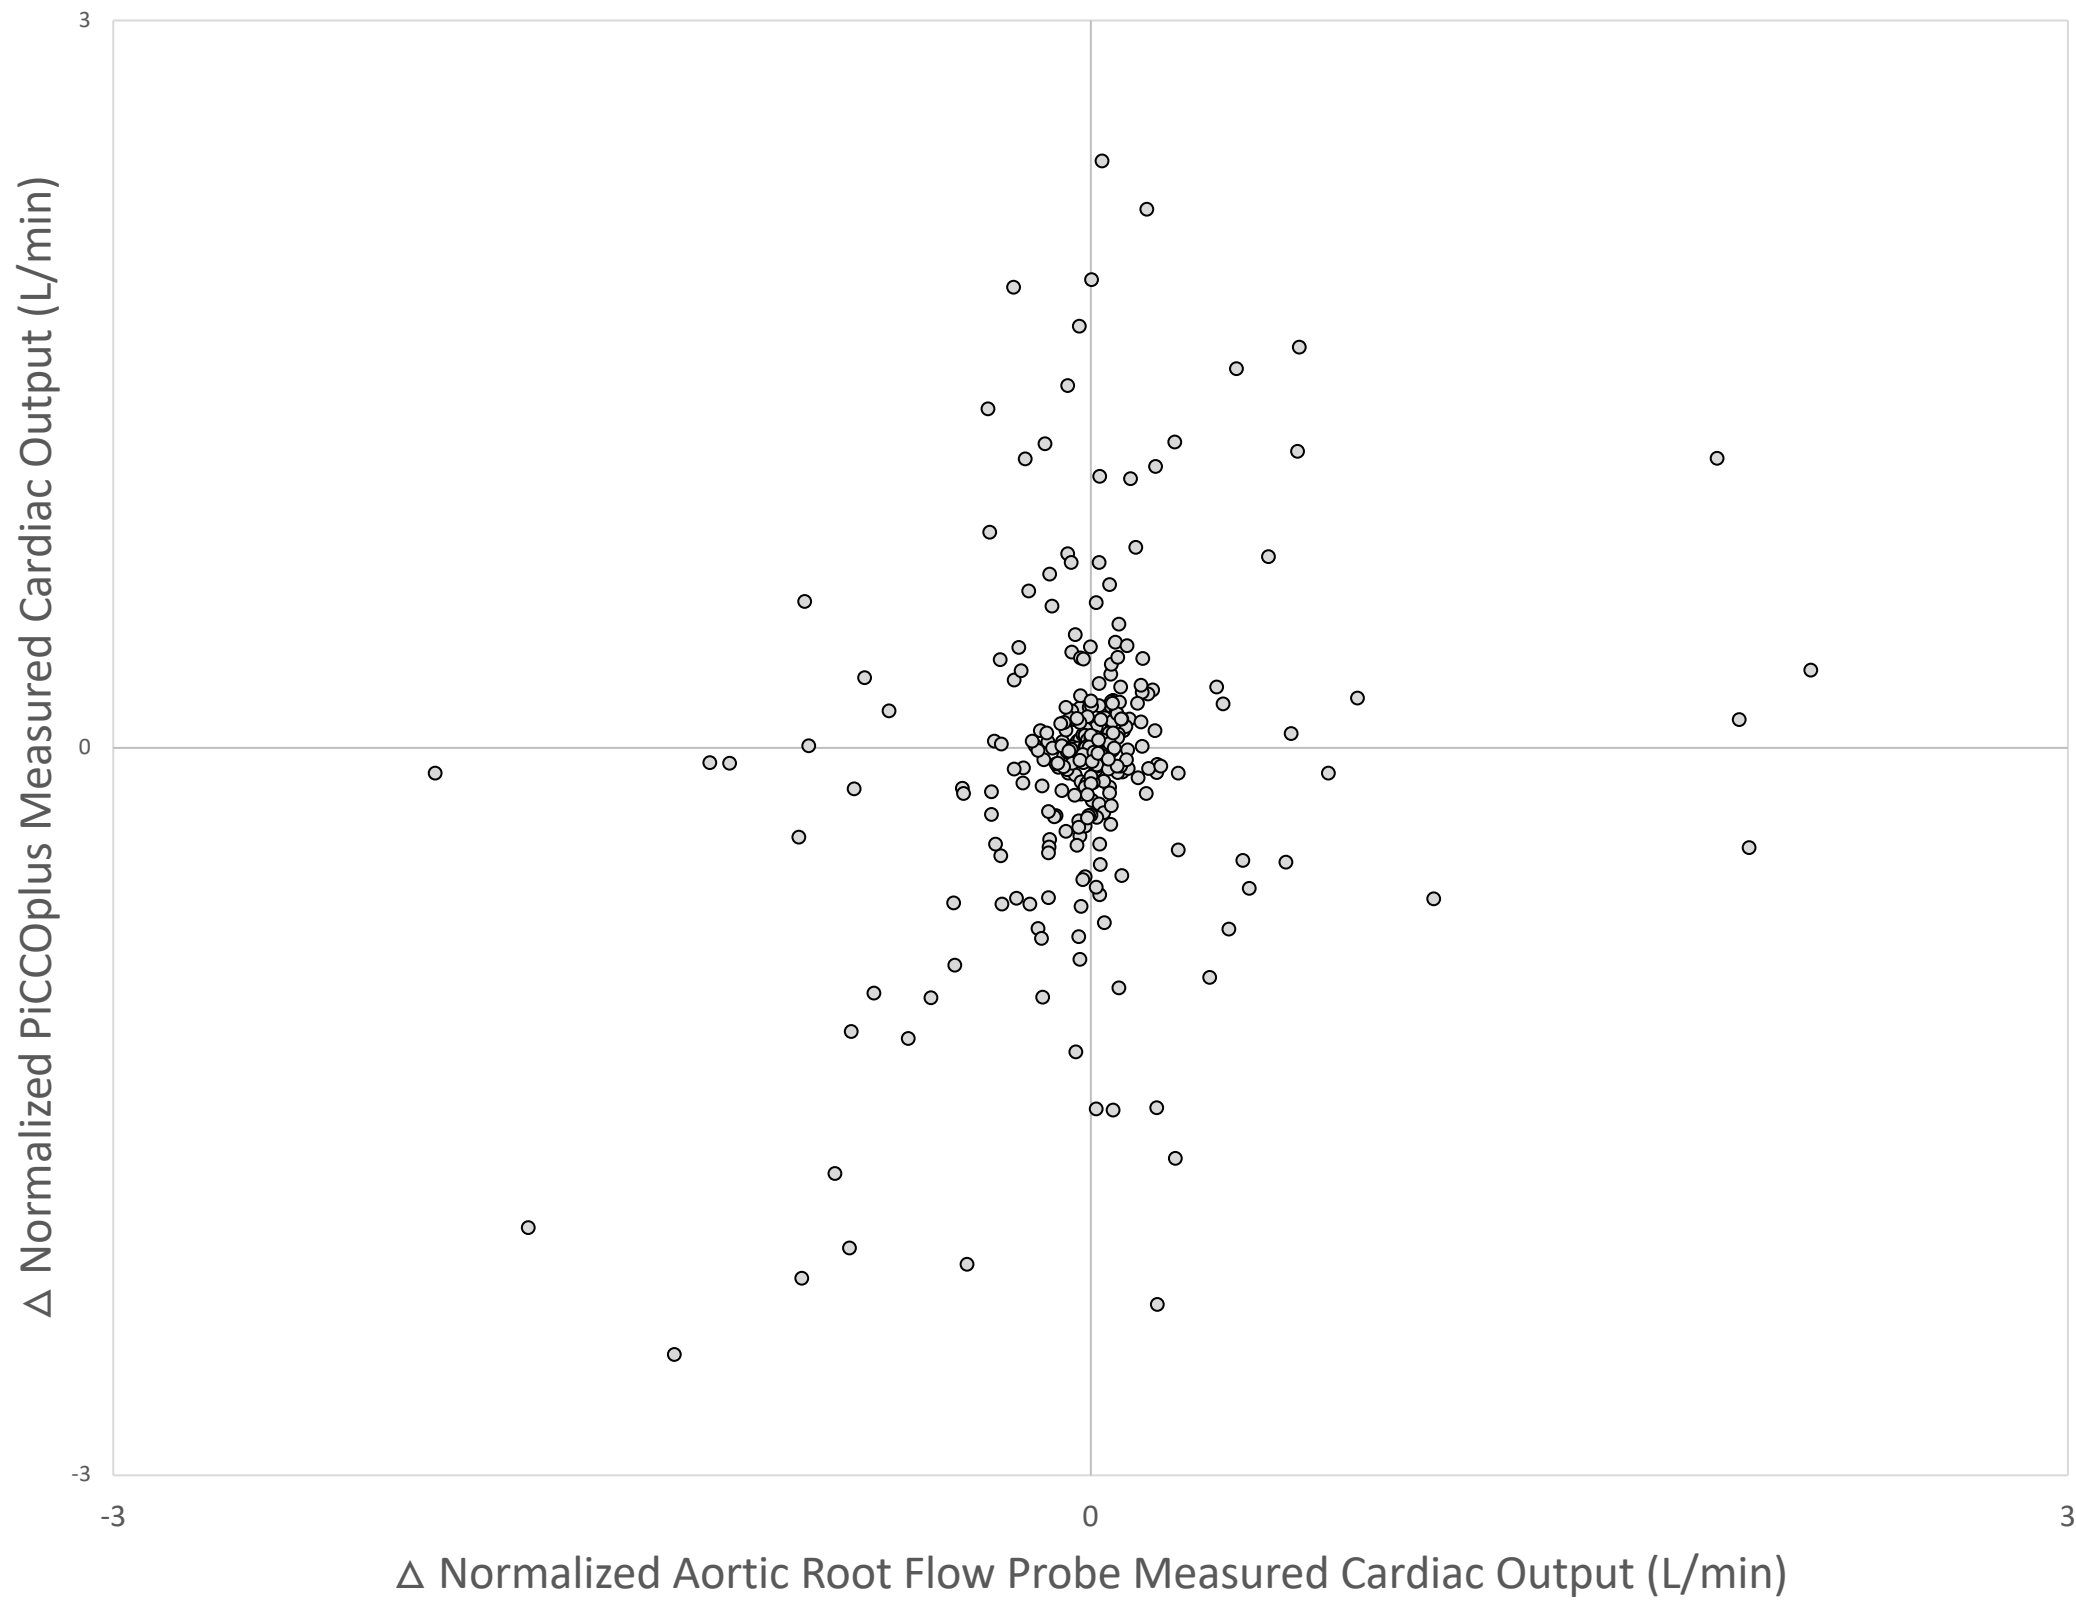

4 Quadrant Plot -  $\Delta$ Flotrac vs  $\Delta$  Aortic Root Flow Probe. All Flows

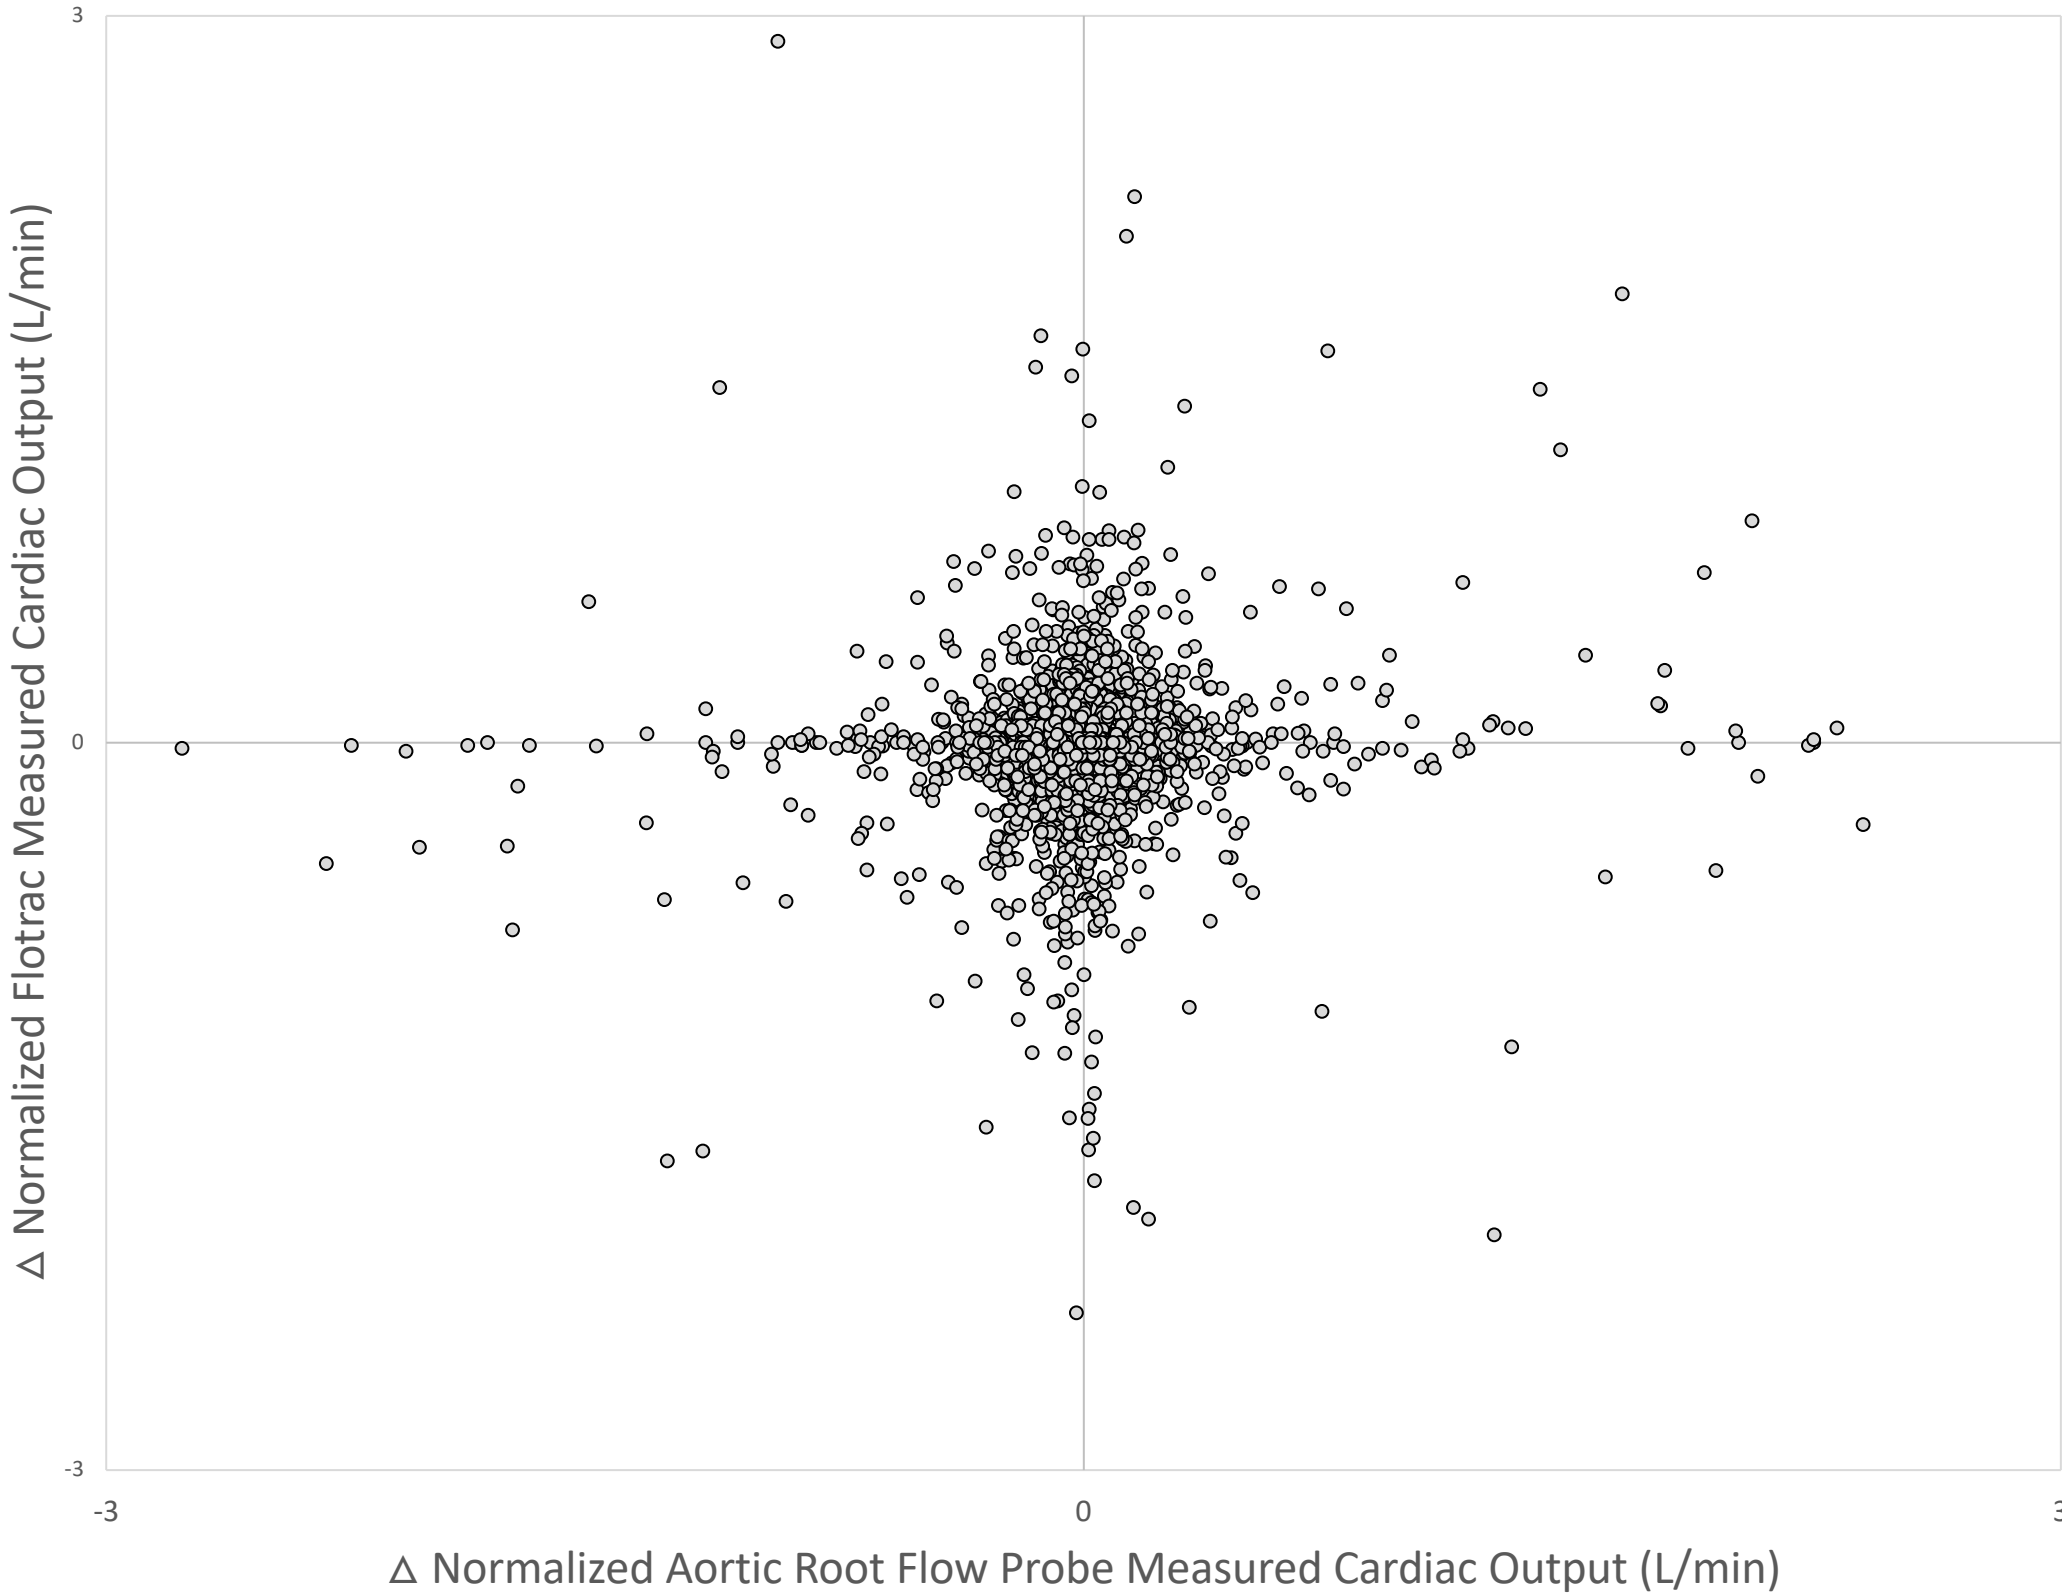

4 Quadrant Plot -  $\Delta$ CardioQ-ODM vs  $\Delta$  Aortic Root Flow Probe. All Flows

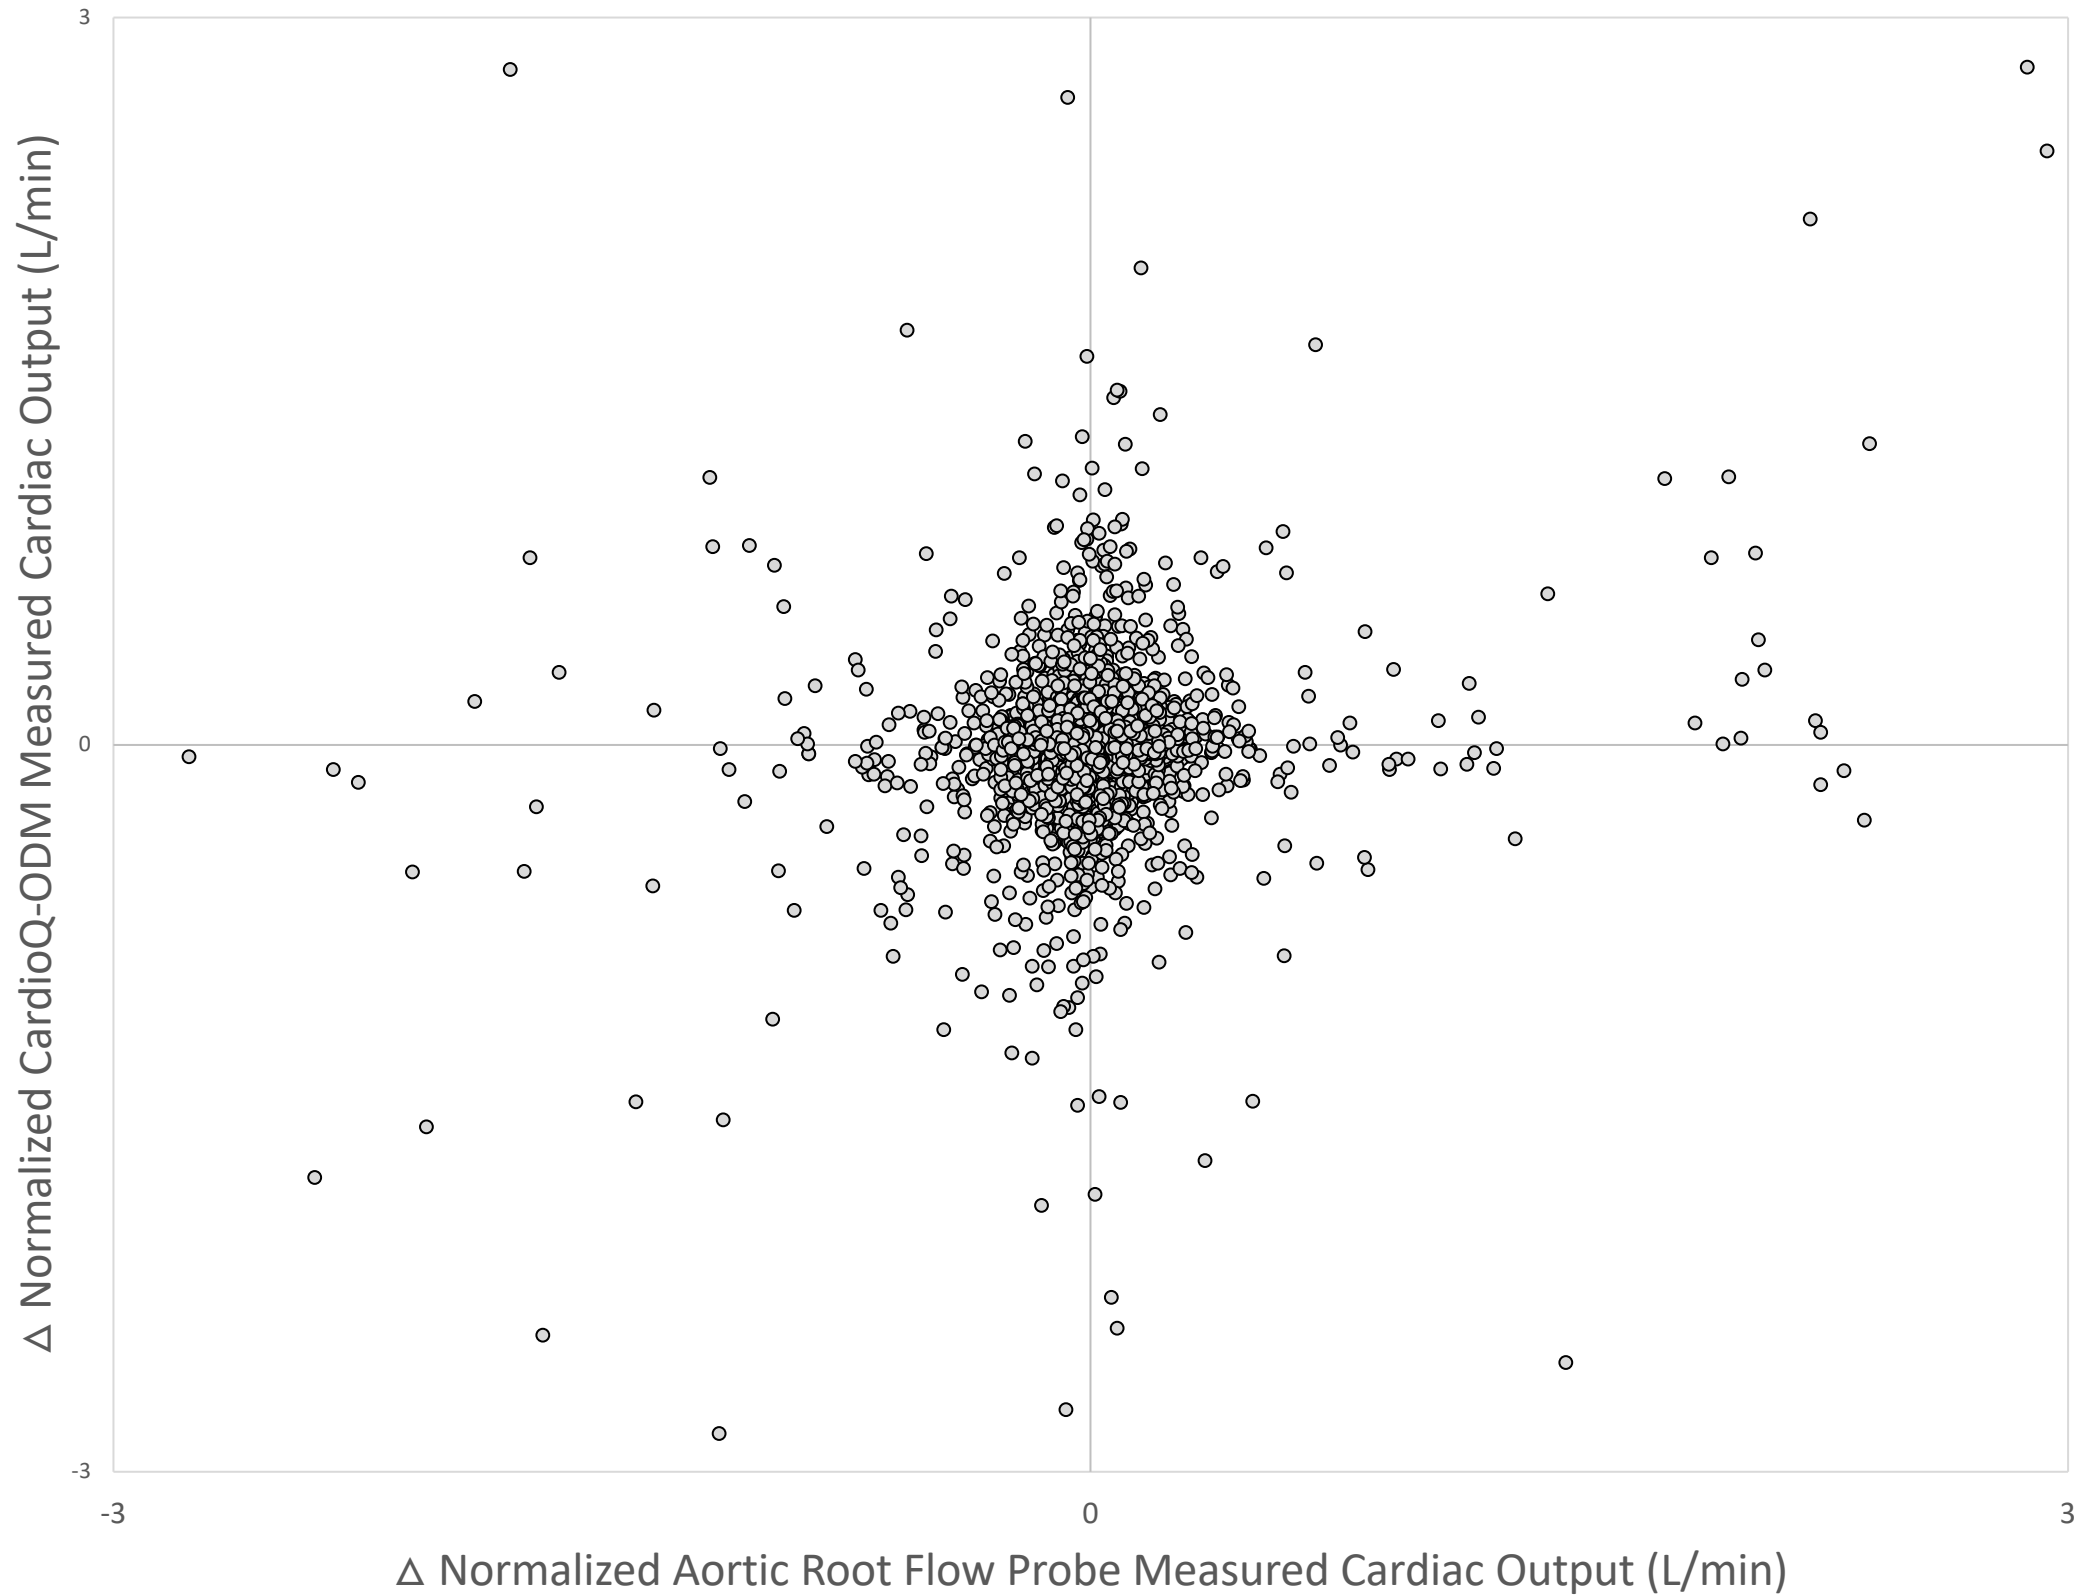

4 Quadrant Plot -  $\Delta$ CardioQ-ODM vs  $\Delta$  Aortic Root Flow Probe. All Flows



4 Quadrant Plot -  $\Delta$ CardioQ-ODM vs  $\Delta$  Aortic Root Flow Probe. All Flows

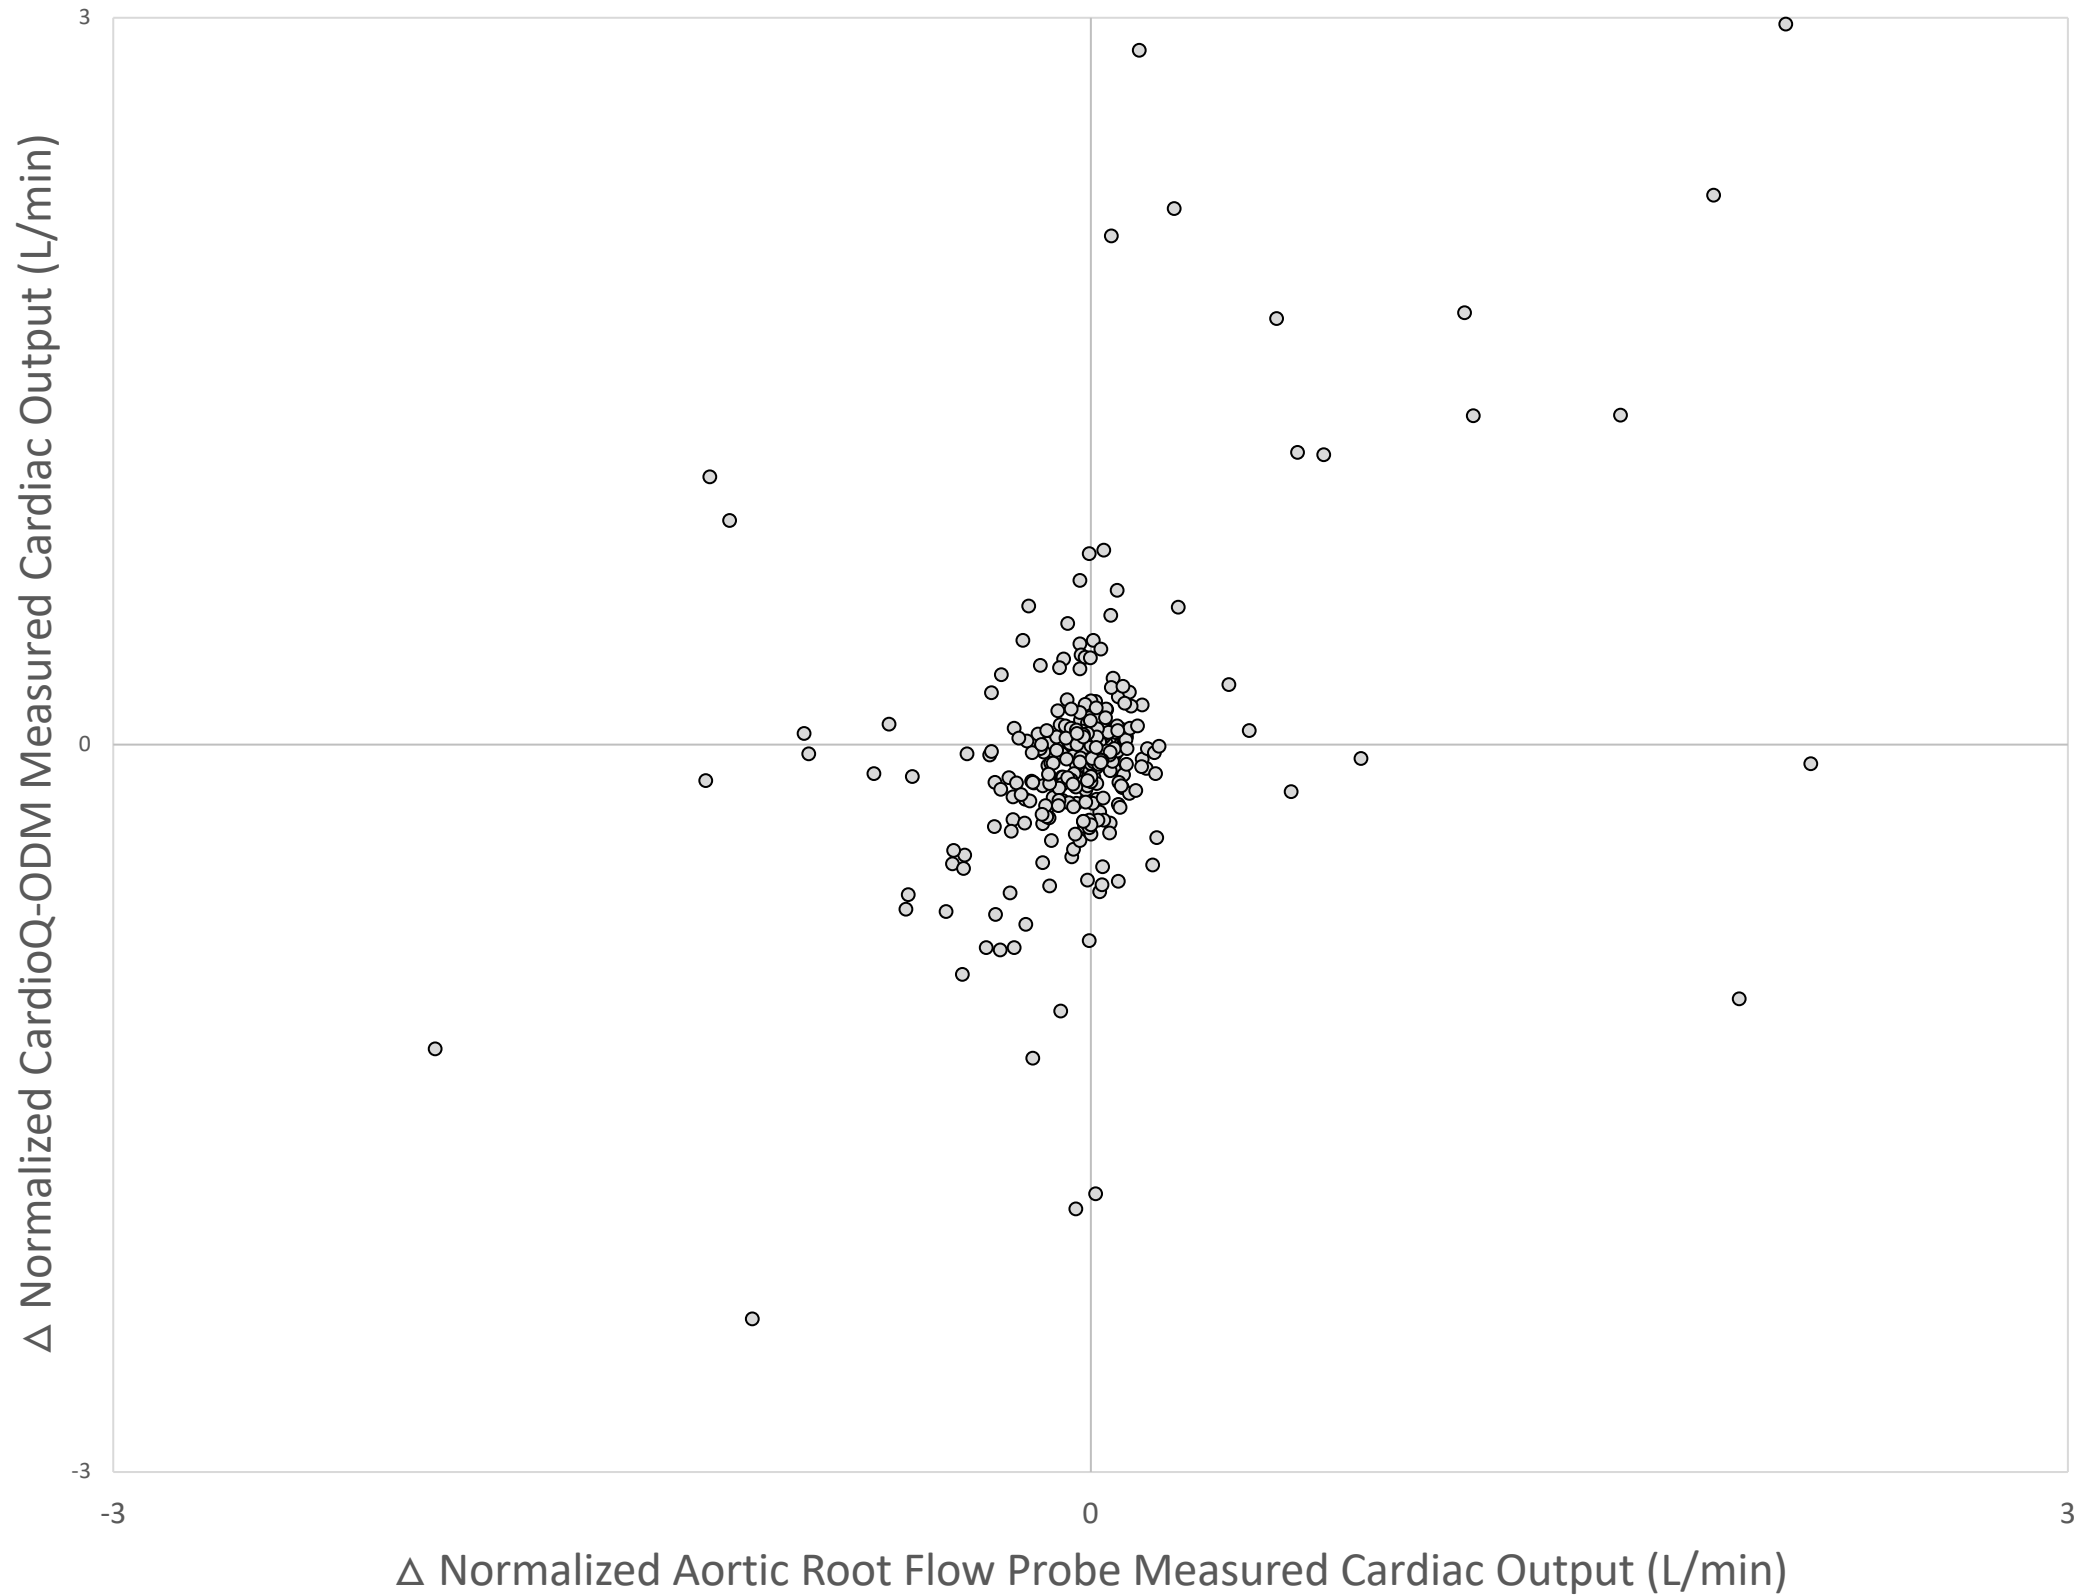

4 Quadrant Plot -  $\Delta$ Mean Arterial Pressure vs  $\Delta$  Aortic Root Flow Probe. All Flows

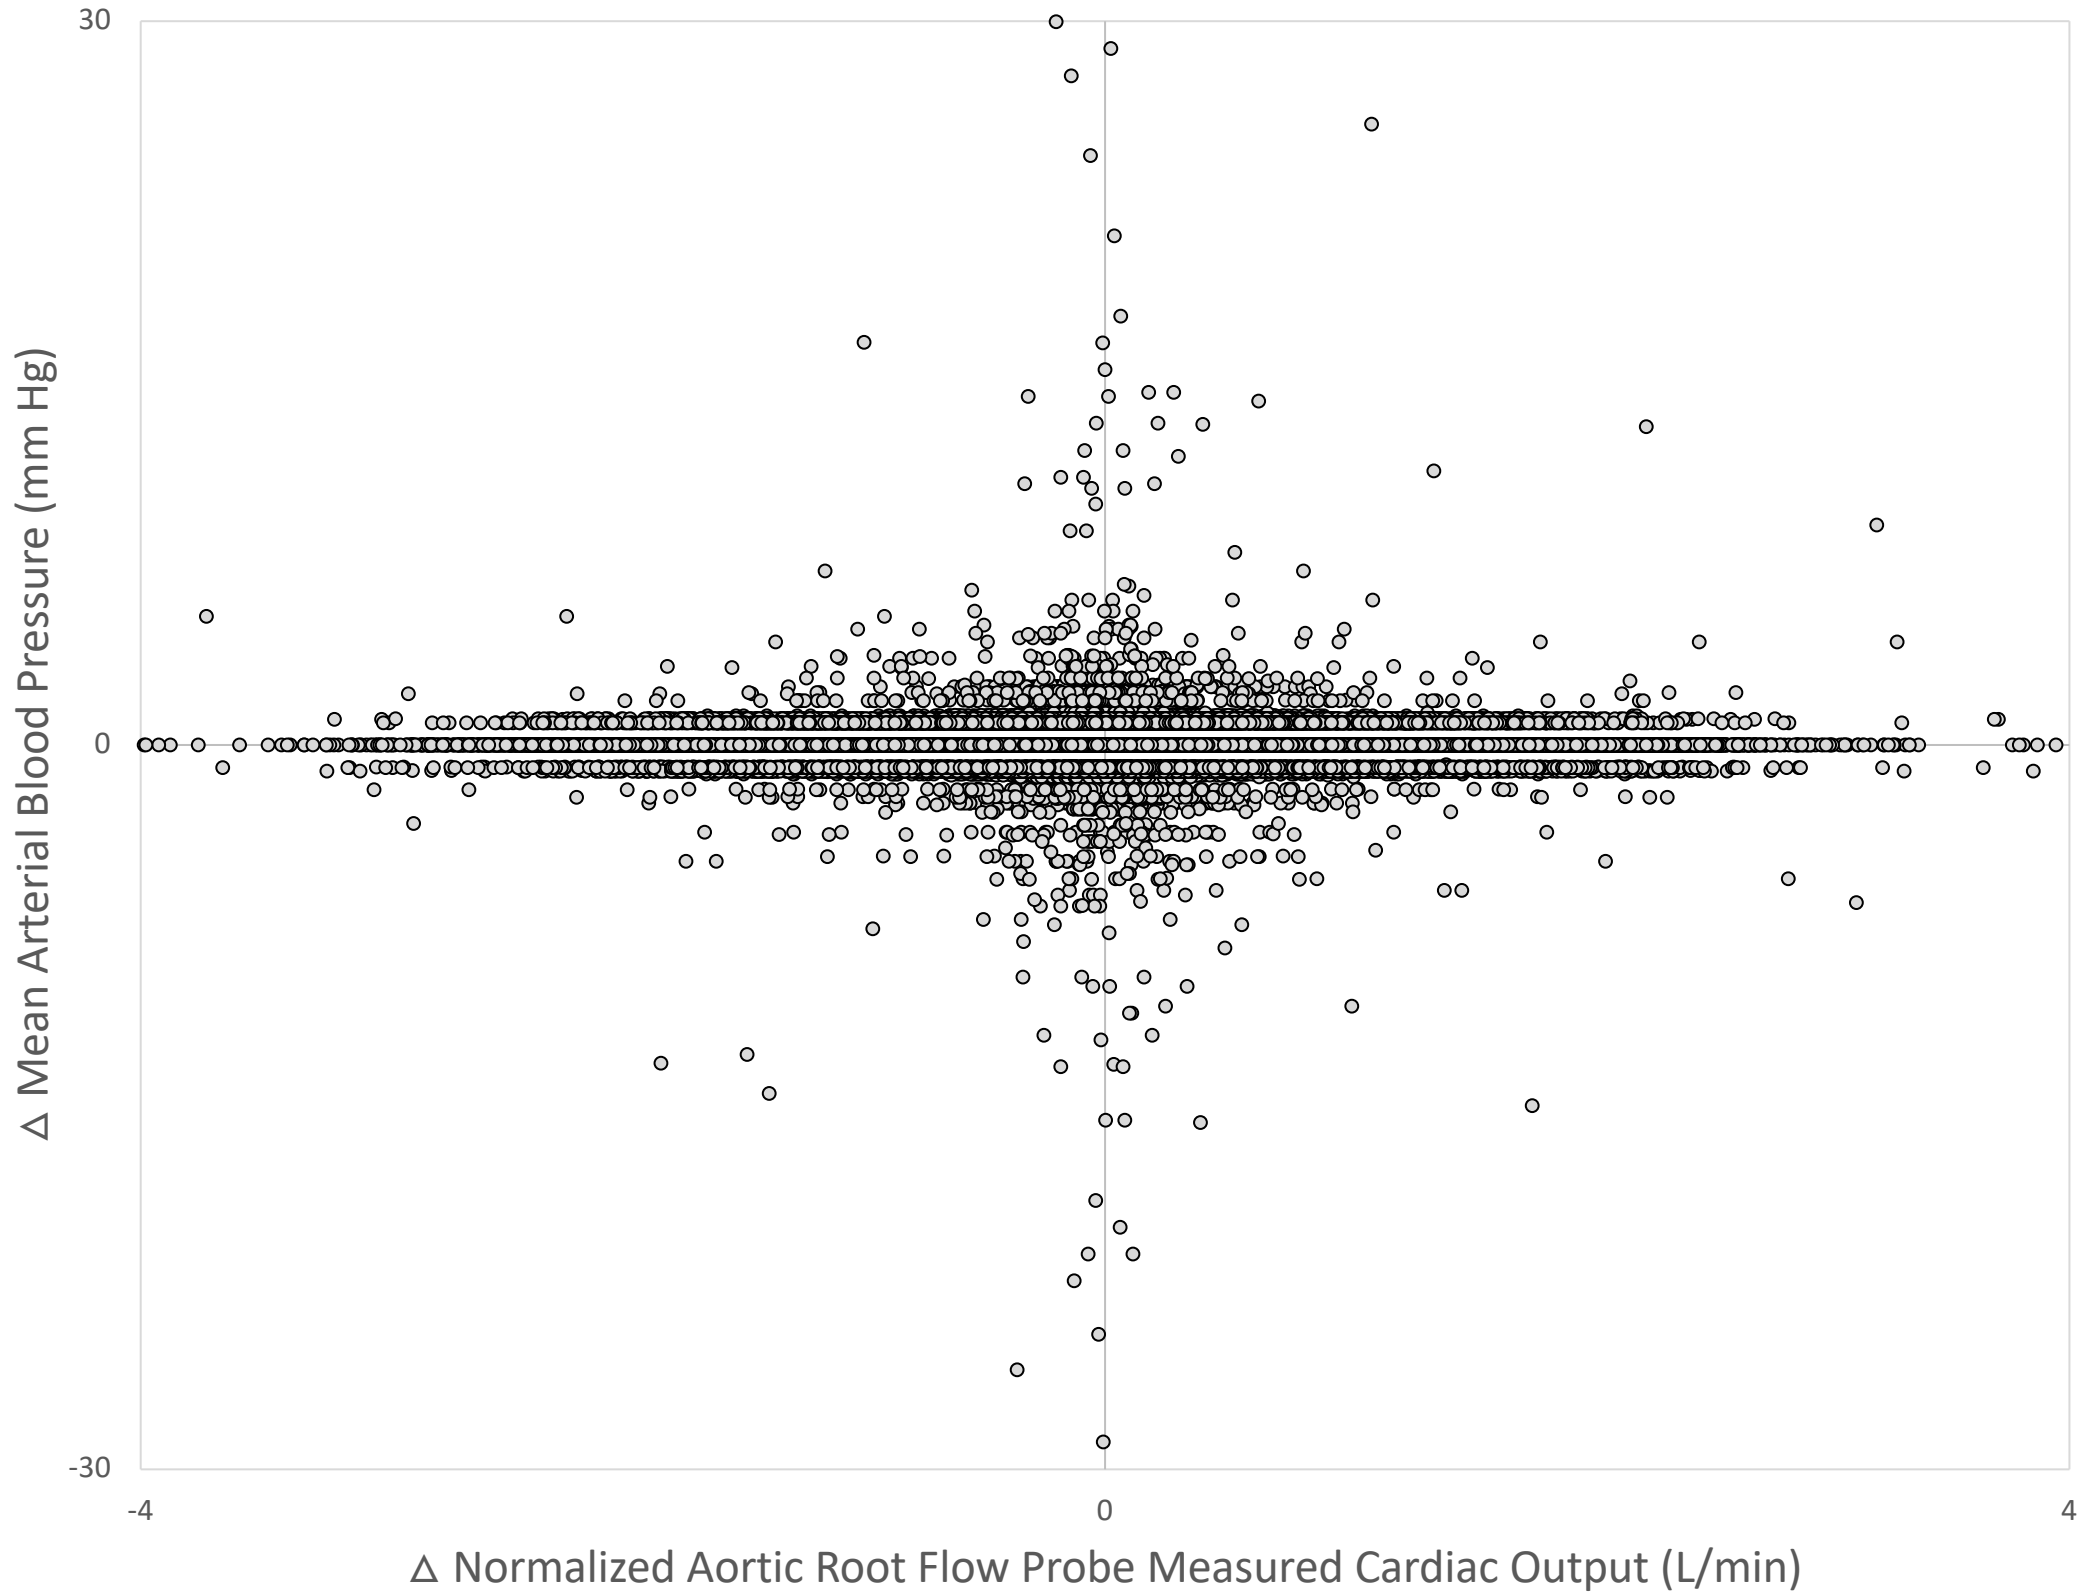

4 Quadrant Plot -  $\Delta$ Mean Arterial Pressure vs  $\Delta$  Aortic Root Flow Probe. Low Flows

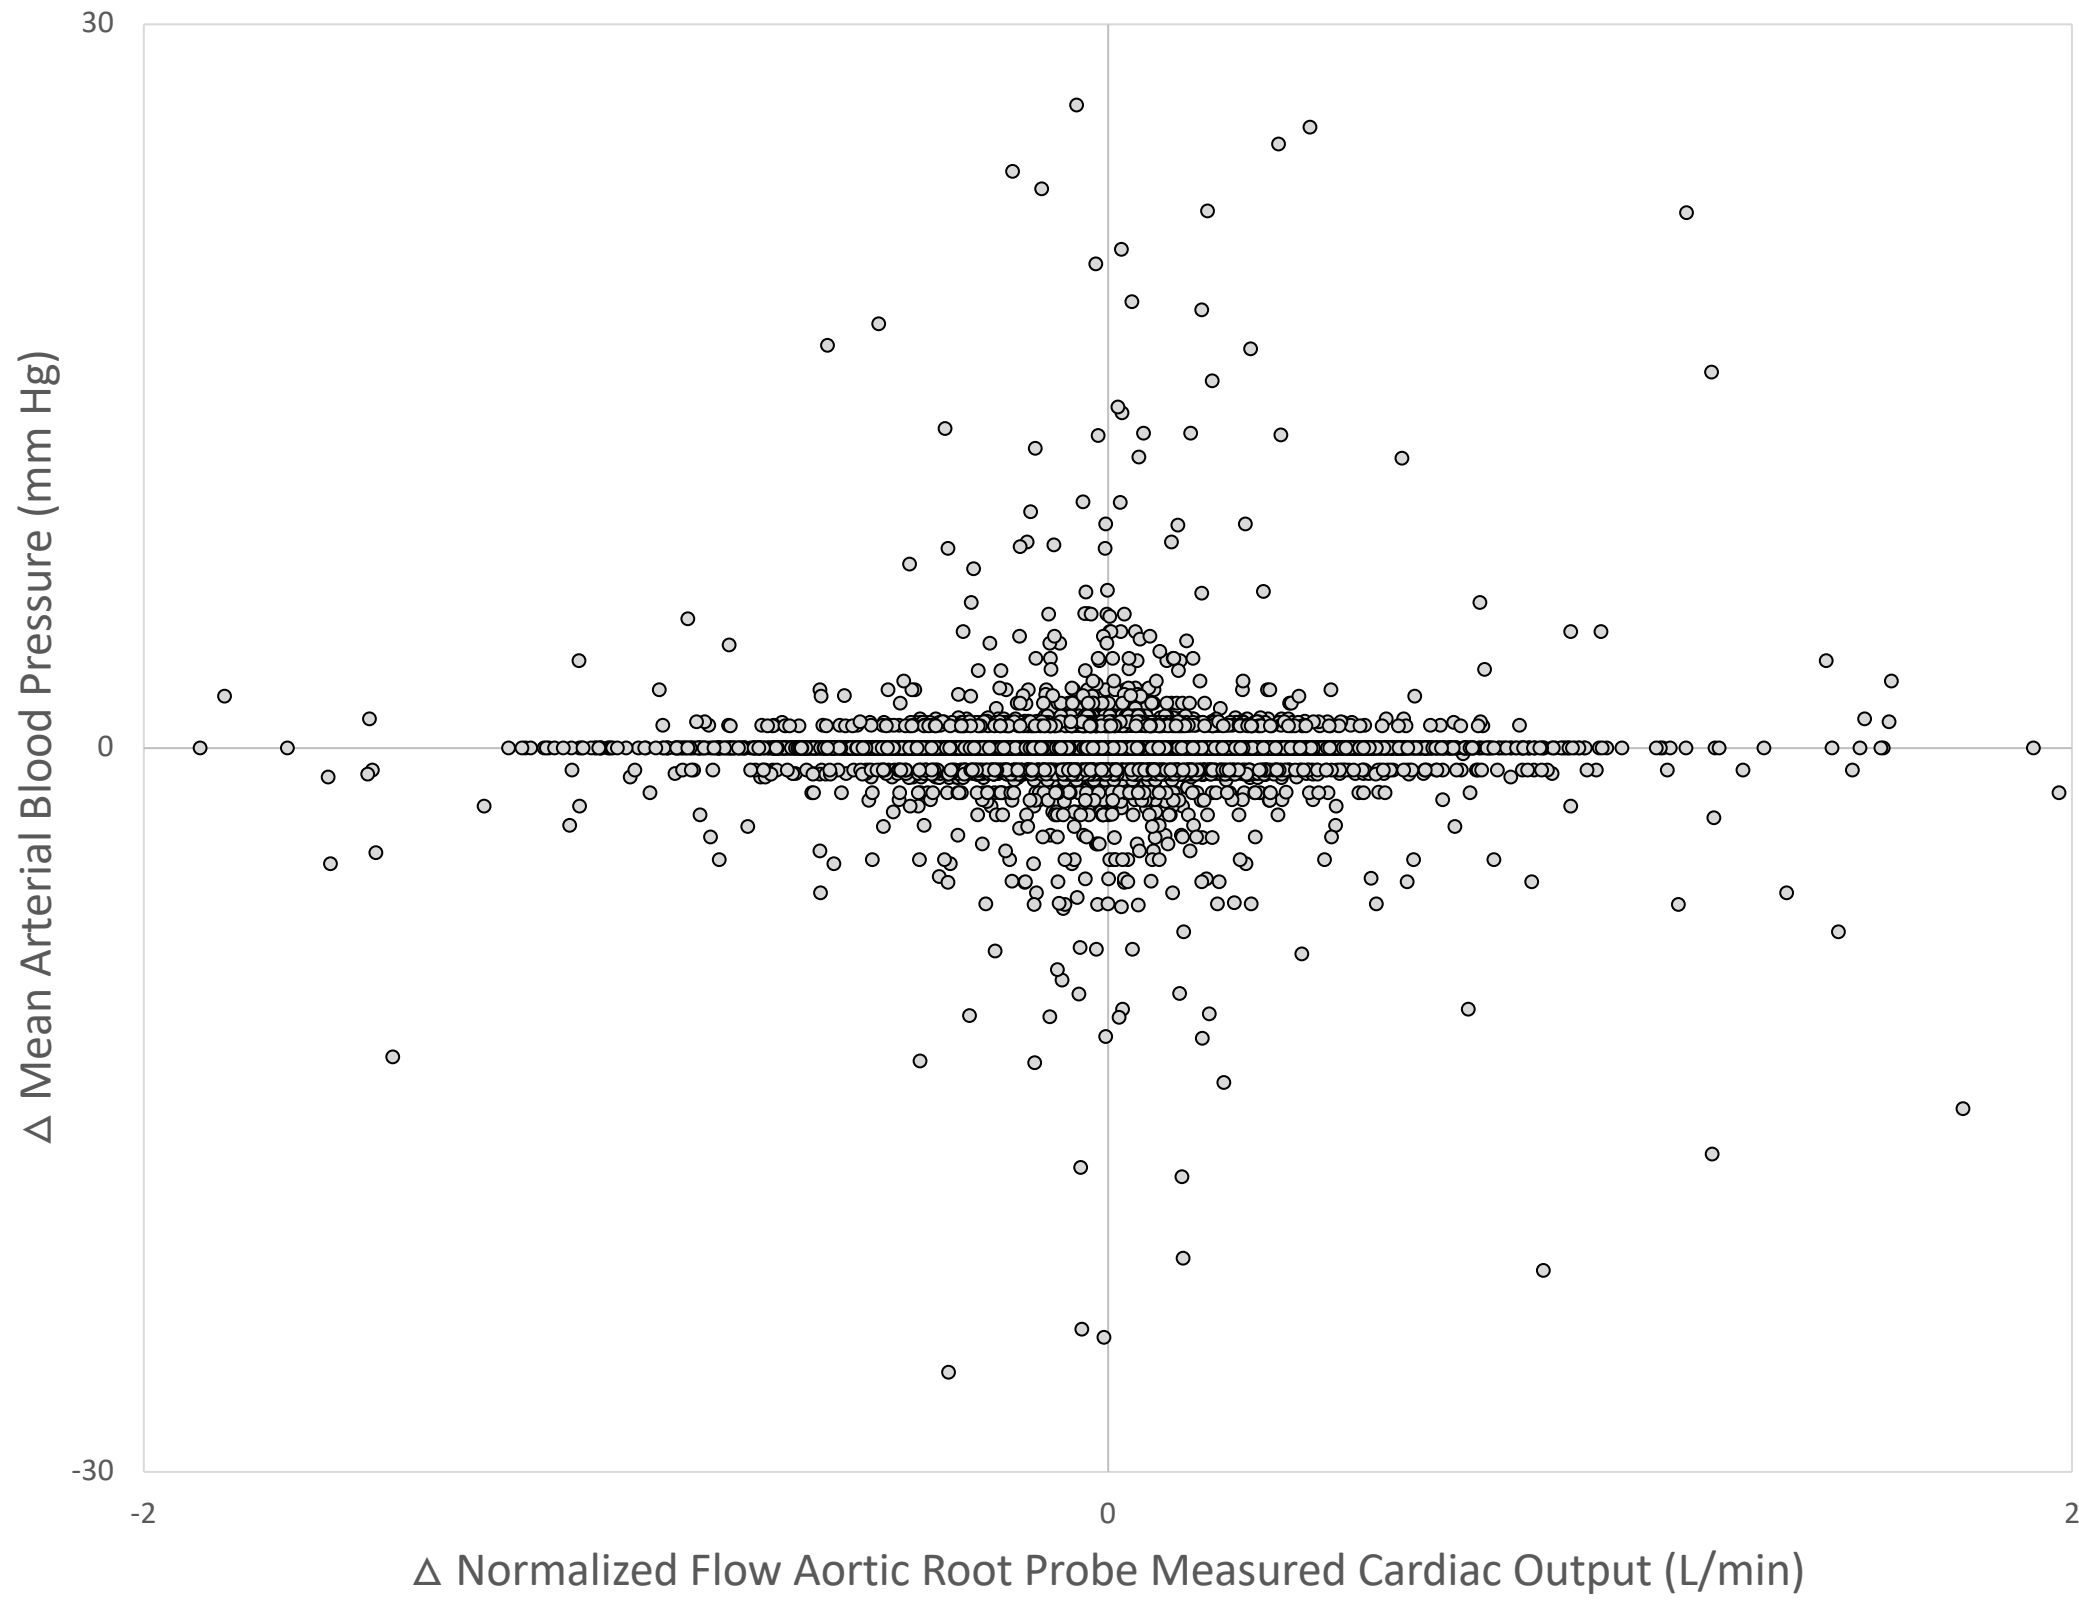

Supplement: 12630_2021_2085_MOESM1_ESM.pdf [file 12630_2021_2085_MOESM1_ESM.pdf]
